# Supplementary material for: Methylated guanosine and uridine modifications in S. cerevisiae mRNAs modulate translation elongation
Source: Royal Society of Chemistry journal article supplement (doi:10.1039/d2cb00229a), 2023-01-01
Supplement: d2cb00229a1.zip [file 2023_0105_RSC_ChemBio_MethGuan_Supplemental.xlsx]

## Sheet: Table S1
Table S1: Linear regression, limit of detection, and R2 calculated from calibration curves made from nucleoside standards. Y corresponds to log(response ratio) and X corresponds to log(concentration(pM)).
Nucleoside	Linear Regression	Limit of Detection (amol)*	R2
A	Y = 0.9264X - 3.632	Not Determined	>0.999
ac4C	Y = 1.005X - 4.344	43	>0.999
acp3U	Y = 1.027X - 5.882	1000	0.995
Am	Y = 0.972X - 3.727	7	>0.999
C	Y = 0.9185X - 3.884	Not Determined	0.998
Cm	Y = 0.9685X - 3.953	41	0.998
cm5U	Y = 0.998X - 4.53	21	>0.999
cmnm5U	Y = 0.9981X - 4.62	160	0.998
cmo5U	Y = 1.007X - 4.982	67	0.998
D	Y = 0.9866X - 5.073	530	>0.999
f5C	Y = 1.017X - 4.412	21	>0.999
G	Y = 0.956X - 4.061	Not Determined	0.998
Gm	Y = 1.012X - 4.319	18	>0.999
hm5C	Y = 1.04X - 4.424	18	>0.999
ho5U	Y = 1.168X - 6.776	3300	0.997
I	Y = 0.9827X - 4.325	170	>0.999
i6A	Y = 0.946X - 3.735	44	>0.999
Im	Y = 1.007X - 4.808	150	0.998
m1A	Y = 0.9792X - 3.76	4	0.999
m1G	Y = 0.9791X - 4.117	9	0.999
m1I	Y = 0.9922X - 4.429	50	0.999
m1Ψ	Y = 0.9835X - 5.088	250	0.998
m3G	Y = 0.9686X - 3.761	4	>0.999
m22G	Y = 1.001X - 4.064	10	>0.999
m2,7G	Y = 1.002X - 4.073	8	>0.999
m2,8A	Y = 1.004X - 4.822	79	0.998
m2A	Y = 0.9996X - 4.341	24	0.997
m2G	Y = 1.004X - 4.29	26	0.998
m3C	Y = 0.9792X - 3.906	8	0.998
m3U	Y = 0.9944X - 4.439	45	>0.999
m5C	Y = 1.005X - 4.139	21	0.998
m5Cm	Y = 1.00X - 3.97	14	0.999
m5s2U	Y = 1.164X - 5.52	250	0.993
m5U	Y = 0.9825X - 4.665	72	0.996
m5Um	Y = 1.029X - 4.836	40	>0.999
m6A	Y = 0.9558X - 3.629	3	>0.999
m6Am	Y = 0.9503X - 3.356	4	>0.999
m6U	Y = 0.9981X - 5.588	640	0.997
m7G	Y = 1.06X - 4.22	11	>0.999
mcm5s2U	Y = 1.061X - 4.909	83	0.993
mcm5U	Y = 0.9751X - 4.457	29	0.995
mo5U	Y = 1.007X - 4.786	67	>0.999
ms2t6A	Y = 1.004X - 4.223	21	>0.999
Ψ	Y = 1.00X - 5.313	930	0.998
s2C	Y = 1.386X - 6.284	1100	0.995
s2U	Y = 0.9031X - 4.843	120	0.986
s4U	Y = 1.448X - 7.433	2000	0.992
t6A	Y = 0.9956X - 4.201	21	>0.999
U	Y = 0.9492X - 4.714	Not Determined	0.999
Um	Y = 0.9891X - 4.993	170	0.995
	* LOD (pM)= 10^(((3 × standard error of regression) + (log_10⁡〖average response ratio of blank〗 ) - (y intercept))/(Slope of linear regression))
	* LOD (pM) was converted to amol using molecular weight and injection volume (5 μL)

## Sheet: Table S2
Table S2: Ribonucleoside standard concentrations displayed in Figure 1A extracted ion chromatogram
Nucleoside	Peak Label	Concentration (nM)
A	26	6.9
ac4C	39	14.4
acp3U	10	72
Am	40	2.9
C	1	6.9
Cm	15	14.4
cm5U	16	14.4
cmnm5U	5	14.4
cmo5U	18	72
D	2	64.8
f5C	23	14.4
G	20	6.9
Gm	34	14.4
hm5C	3	14.4
ho5U	9	360
I	19	14.4
i6A	50	2.9
Im	32	14.4
m1A	7	2.9
m1G	33	14.4
m1I	35	14.4
m1Ψ	14	72
m3G	36	2.9
m22G	45	2.9
m2,7G	25	2.9
m2,8A	43	14.4
m2A	30	14.4
m2G	38	14.4
m3C	6	2.9
m3U	31	14.4
m5C	8	2.9
m5Cm	21	2.9
m5s2U	41	14.4
m5U	22	32
m5Um	42	14.4
m6A	44	2.9
m6Am	47	0.58
m6U	17	72
m7G	12	2.9
mcm5s2U	46	14.4
mcm5U	37	14.4
mo5U	24	14.4
ms2t6A	49	2.9
Ψ	4	64.8
s2C	13	14.4
s2U	27	72
s4U	29	72
t6A	48	2.9
U	11	34.6
Um	28	72

## Sheet: Table S3
Table S3: Number of mapped RNA-seq reads for each transcript detected in total RNA and purified mRNA samples
		Number of mapped reads
Transcript ID	RNA Species	Total RNA replicate 1	Total RNA replicate 2	mRNA replicate 1	mRNA replicate 2
ETS1-1--ETS1-2	rRNA	61952	58851	3287	4000
ETS2-1--ETS2-2	rRNA	793	454	943	732
HRA1	ncRNA	34	44	438	520
ICR1	ncRNA	190	140	893	1006
ICR1--PWR1	ncRNA	62	43	173	181
ICR1--YIR020C	ncRNA--mRNA	23	15	193	199
ICR1--YIR020W-A	ncRNA--mRNA	29	15	89	87
IRT1	ncRNA	192	126	3761	4818
ITS1-1--ITS1-2	rRNA	17549	16335	33	67
ITS1-1--YLR154W-F--ITS1-2	rRNA--mRNA	33	45	0	0
ITS2-1--ITS2-2	rRNA	58703	51245	94	158
LSR1	snRNA	51754	46102	5546	6823
NME1	snoRNA	1079	1028	196	212
Q0010	mRNA	13	13	5	13
Q0010--Q0017	mRNA	2	2	0	0
Q0017	mRNA	5	0	0	2
Q0020	rRNA	8285	7323	35	26
Q0032	mRNA	4	0	0	1
Q0045	mRNA	357	217	61	79
Q0045--Q0060--Q0050--Q0055--Q0070--Q0065	mRNA	130	97	10	10
Q0045--Q0060--Q0055--Q0070--Q0065	mRNA	12	8	0	1
Q0045--Q0060--Q0070--Q0065	mRNA	11	13	1	1
Q0045--Q0070	mRNA	80	52	73	60
Q0045--Q0070--Q0065	mRNA	839	608	44	59
Q0050	mRNA	2983	2024	103	122
Q0055	mRNA	1298	885	29	53
Q0060	mRNA	317	170	10	11
Q0065	mRNA	172	90	33	44
Q0070	mRNA	43	18	63	80
Q0075	mRNA	83	39	27	32
Q0085	mRNA	655	440	15	14
Q0092	mRNA	2	2	0	6
Q0105	mRNA	162	113	7	17
Q0110	mRNA	109	37	3	6
Q0115	mRNA	70	31	2	2
Q0120	mRNA	642	367	12	16
Q0120--Q0105	mRNA	179	84	1	0
Q0120--Q0110--Q0115--Q0105	mRNA	146	91	2	2
Q0120--Q0115--Q0105	mRNA	20	15	1	1
Q0130	mRNA	280	190	140	203
Q0140	mRNA	32	14	19	25
Q0142	mRNA	9	1	8	3
Q0143	mRNA	0	2	2	1
Q0144	mRNA	6	2	4	3
Q0158	rRNA	30610	25072	106	107
Q0160	mRNA	119	68	128	105
Q0182	mRNA	5	5	0	0
Q0182--tL(UAA)Q	mRNA--tRNA	0	1	0	0
Q0250	mRNA	204	109	34	38
Q0255	mRNA	106	32	1	6
Q0275	mRNA	368	231	16	18
Q0285	ncRNA	6	1	0	2
Q0285--Q0297	ncRNA--mRNA	8	8	1	0
RDN25-1--RDN37-1	rRNA	91	30	0	0
RDN25-1--RDN37-1--RDN37-2--RDN25-2	rRNA	24930684	26158444	18734	29426
RDN25-1--RDN37-1--RDN37-2--RDN25-2--YLR154C-G	rRNA--mRNA	889525	956272	616	1064
RDN25-1--RDN37-1--RDN37-2--RDN25-2--YLR162W	rRNA--mRNA	275	180	7	0
RDN25-1--RDN37-1--YLR154W-A--RDN37-2--RDN25-2	rRNA--mRNA	676217	672357	513	915
RDN25-1--RDN37-1--YLR154W-A--RDN37-2--RDN25-2--YLR162W-A	rRNA--mRNA	1110	855	0	2
RDN25-1--RDN37-1--YLR154W-B--RDN37-2--RDN25-2	rRNA--mRNA	415195	412878	370	540
RDN25-1--RDN37-1--YLR154W-C--RDN37-2--RDN25-2	rRNA--mRNA	12898078	11587453	9922	14515
RDN37-1	rRNA	13	0	0	0
RDN37-1--RDN18-1	rRNA	11	0	0	0
RDN37-1--RDN18-1--RDN37-2--RDN18-2	rRNA	45685873	41155220	22589	37849
RDN37-1--RDN37-2	rRNA	3561	3439	5	7
RDN37-1--RDN58-1--RDN37-2--RDN58-2	rRNA	4452	4654	3	17
RDN37-1--RDN58-1--YLR154W-E--RDN37-2--RDN58-2	rRNA--mRNA	51332	56139	35	49
RDN37-1--YLR154W-F--RDN18-1--RDN37-2--RDN18-2	rRNA--mRNA	5831	5388	7	6
RDN37-2--RDN25-2	rRNA	2	6	0	0
RDN5-1--RDN5-2--RDN5-3--RDN5-4--RDN5-5--RDN5-6	rRNA	53	12	26	22
RDN5-1--RDN5-2--YLR154C-H--RDN5-3--YLR156C-A--RDN5-4--YLR157C-C--RDN5-5--YLR159C-A--RDN5-6	rRNA--mRNA	941	669	206	188
RDN5-1--RDN5-6	rRNA	46	19	23	14
RDN5-2--YLR154C-H--RDN5-3--YLR156C-A--RDN5-4--YLR157C-C--RDN5-5--YLR159C-A	rRNA--mRNA	2	0	0	0
RME2	ncRNA	16	14	361	380
RME2--YGL192W	ncRNA--mRNA	358	238	5426	5447
RME2--YGL193C	ncRNA--mRNA	63	46	1137	1284
RNA170	ncRNA	7	1	37	28
RPR1	ncRNA	924	1182	262	310
RUF20	ncRNA	10	4	129	166
RUF21	ncRNA	29	19	322	341
RUF22	ncRNA	20	2	13	18
RUF23	ncRNA	6	8	73	125
RUF5-1--RUF5-2	ncRNA	719	519	19185	21467
RUF5-1--YHR052W-A--RUF5-2--YHR054W-A	ncRNA--mRNA	24	35	529	625
RUF5-1--YHR052W-A--YHR053C--RUF5-2--YHR054W-A--YHR055C	ncRNA--mRNA	341	271	11398	13022
RUF5-1--YHR053C--RUF5-2--YHR055C	ncRNA--mRNA	31	26	1655	1955
SCR1	ncRNA	132446	136899	3525	5076
snR10	snoRNA	3	2	13	20
snR11	snoRNA	954	820	834	870
snR128	snoRNA	127	164	27	28
snR13	snoRNA	19	9	55	51
snR14	snRNA	25	18	78	104
snR161	snoRNA	15	17	52	85
snR17a	snoRNA	8872	8020	290	367
snR17b	snoRNA	2427	2345	313	370
snR18	snoRNA	11	10	134	101
snR189	snoRNA	293	260	25	31
snR19	snRNA	20010	17448	3154	3921
snR190	snoRNA	407	352	47	70
snR191	snoRNA	257	185	598	703
snR24	snoRNA	2	0	55	49
snR3	snoRNA	2103	2381	149	178
snR30	snoRNA	14591	13885	937	1130
snR31	snoRNA	153	140	124	123
snR32	snoRNA	5007	5304	382	552
snR33	snoRNA	95	92	192	253
snR34	snoRNA	303	307	67	70
snR35	snoRNA	43	53	13	22
snR36	snoRNA	63	63	275	381
snR37	snoRNA	1472	1199	106	87
snR38	snoRNA	1	0	35	20
snR39	snoRNA	5	2	33	29
snR39B	snoRNA	231	216	553	678
snR4	snoRNA	1847	1728	479	556
snR40	snoRNA	9	6	19	17
snR41	snoRNA	18	23	97	77
snR42	snoRNA	448	326	99	166
snR43	snoRNA	37	18	111	130
snR44	snoRNA	110	81	1669	1770
snR45	snoRNA	95	72	36	38
snR46	snoRNA	116	86	90	93
snR47	snoRNA	1	4	17	17
snR48	snoRNA	9	12	84	80
snR49	snoRNA	88	50	217	256
snR5	snoRNA	42	40	17	24
snR50	snoRNA	8	4	34	25
snR51	snoRNA	14	9	142	130
snR52	snoRNA	1	0	9	6
snR53	snoRNA	1	0	17	11
snR54	snoRNA	8	5	106	157
snR55	snoRNA	6	5	52	39
snR56	snoRNA	1	1	11	11
snR57	snoRNA	21	14	18	39
snR58	snoRNA	2	0	8	12
snR59	snoRNA	4	0	7	10
snR6	snoRNA	0	2	2	3
snR60	snoRNA	30	30	370	421
snR61	snoRNA	4	0	13	18
snR62	snoRNA	5	4	13	24
snR63	snoRNA	2419	1939	653	820
snR64	snoRNA	5	5	8	13
snR65	snoRNA	8	2	32	34
snR66	snoRNA	3	2	60	61
snR67	snoRNA	13	8	15	20
snR68	snoRNA	36	38	59	56
snR69	snoRNA	2	8	13	15
snR7-L	snRNA	1	0	9	14
snR7-L--snR7-S	snRNA	705	677	49	71
snR70	snoRNA	33	19	168	189
snR71	snoRNA	16	12	123	140
snR72	snoRNA	6	7	33	30
snR73	snoRNA	6	12	20	23
snR73--YMR013W-A	snoRNA--mRNA	28	26	39	42
snR74	snoRNA	8	2	6	11
snR75	snoRNA	5	2	2	2
snR76	snoRNA	61	74	239	228
snR77	snoRNA	31	23	60	69
snR78	snoRNA	13	17	40	38
snR79	snoRNA	2	8	17	19
snR8	snoRNA	75	73	37	32
snR80	snoRNA	21	37	37	34
snR81	snoRNA	273	284	96	82
snR82	snoRNA	4097	3147	756	626
snR83	snoRNA	19774	15299	1887	1994
snR84	snoRNA	694	553	324	327
snR85	snoRNA	151	176	91	96
snR86	snoRNA	20845	17621	6195	7393
snR87	snoRNA	6	1	27	34
snR9	snoRNA	87	91	215	208
SRG1	ncRNA	176	156	2406	2713
SRG1--YER081W	ncRNA--mRNA	13	8	246	268
tA(AGC)D	tRNA	8	4	22	25
tA(AGC)F	tRNA	8	4	22	25
tA(AGC)G	tRNA	8	4	22	25
tA(AGC)H	tRNA	8	4	22	25
tA(AGC)J	tRNA	8	4	22	25
tA(AGC)K1--tA(AGC)K2	tRNA	8	4	22	25
tA(AGC)L	tRNA	8	4	22	25
tA(AGC)M1--tA(AGC)M2	tRNA	8	4	22	25
tA(AGC)P	tRNA	8	4	22	25
tA(UGC)A	tRNA	7	9	6	2
tA(UGC)E	tRNA	7	9	6	2
tA(UGC)G	tRNA	7	9	6	2
tA(UGC)L	tRNA	7	9	6	2
tA(UGC)O	tRNA	7	9	6	2
tA(UGC)Q	tRNA	1	0	0	0
tC(GCA)B	tRNA	8	2	13	5
tC(GCA)G	tRNA	8	2	13	5
tC(GCA)P1--tC(GCA)P2	tRNA	8	2	13	5
tD(GUC)B	tRNA	17	11	20	26
tD(GUC)D	tRNA	17	11	20	26
tD(GUC)G1--tD(GUC)G2	tRNA	17	11	20	26
tD(GUC)I1--tD(GUC)I2	tRNA	17	11	20	26
tD(GUC)J1--tD(GUC)J2--tD(GUC)J3--tD(GUC)J4	tRNA	17	11	20	26
tD(GUC)K	tRNA	17	11	20	26
tD(GUC)L1--tD(GUC)L2	tRNA	17	11	20	26
tD(GUC)M	tRNA	17	11	20	26
tD(GUC)N	tRNA	11	10	20	28
tD(GUC)O	tRNA	17	11	20	26
tE(CUC)I	tRNA	2	1	3	4
tE(UUC)B	tRNA	10	5	80	81
tE(UUC)C	tRNA	10	5	80	81
tE(UUC)E1--tE(UUC)E2--tE(UUC)E3	tRNA	10	5	80	81
tE(UUC)G1--tE(UUC)G2--tE(UUC)G3	tRNA	10	5	80	81
tE(UUC)I	tRNA	10	5	80	81
tE(UUC)J	tRNA	10	5	80	81
tE(UUC)K	tRNA	10	5	80	81
tE(UUC)L	tRNA	10	5	80	81
tE(UUC)M	tRNA	6	3	35	36
tE(UUC)P	tRNA	10	5	80	81
tE(UUC)Q	tRNA	0	0	1	4
tF(GAA)B	tRNA	0	0	0	1
tF(GAA)D	tRNA	0	0	0	1
tF(GAA)F	tRNA	0	0	0	1
tF(GAA)G	tRNA	0	0	0	1
tF(GAA)H1--tF(GAA)H2	tRNA	0	0	0	1
tF(GAA)M	tRNA	0	0	0	1
tF(GAA)N	tRNA	0	0	0	1
tF(GAA)P1--tF(GAA)P2	tRNA	0	0	0	1
tF(GAA)Q	tRNA	3	0	0	0
tG(CCC)D	tRNA	3	0	0	0
tG(CCC)O	tRNA	0	0	1	0
tG(GCC)B	tRNA	6	6	14	20
tG(GCC)C	tRNA	6	6	14	20
tG(GCC)D1--tG(GCC)D2	tRNA	6	6	14	20
tG(GCC)E	tRNA	6	6	14	20
tG(GCC)F1--tG(GCC)F2	tRNA	6	6	14	20
tG(GCC)G1--tG(GCC)G2	tRNA	6	6	14	20
tG(GCC)J1--tG(GCC)J2	tRNA	6	6	14	20
tG(GCC)M	tRNA	6	6	14	20
tG(GCC)O1--tG(GCC)O2	tRNA	6	6	14	20
tG(GCC)P1--tG(GCC)P2	tRNA	6	6	14	20
tG(UCC)G	tRNA	0	0	0	2
tG(UCC)O	tRNA	0	0	0	2
tG(UCC)Q	tRNA	3	1	0	0
tH(GUG)E1--tH(GUG)E2	tRNA	46	57	125	134
tH(GUG)G1--tH(GUG)G2	tRNA	46	57	125	134
tH(GUG)H	tRNA	46	57	125	134
tH(GUG)K	tRNA	46	57	125	134
tH(GUG)M	tRNA	46	57	125	134
tI(AAU)B	tRNA	7	12	16	13
tI(AAU)D	tRNA	7	12	16	13
tI(AAU)E1--tI(AAU)E2	tRNA	7	12	16	13
tI(AAU)G	tRNA	7	12	16	13
tI(AAU)I1--tI(AAU)I2	tRNA	7	12	16	13
tI(AAU)L1--tI(AAU)L2	tRNA	7	12	16	13
tI(AAU)N1--YNL017C--tI(AAU)N2	tRNA--mRNA	7	12	16	13
tI(AAU)P1--tI(AAU)P2	tRNA	7	12	16	13
tI(UAU)L	tRNA	0	0	0	1
tK(CUU)C	tRNA	7	4	28	39
tK(CUU)D1--YDR445C--tK(CUU)D2	tRNA--mRNA	7	4	28	39
tK(CUU)E1--tK(CUU)E2	tRNA	7	4	28	39
tK(CUU)F	tRNA	7	4	28	39
tK(CUU)G1--tK(CUU)G2--tK(CUU)G3	tRNA	7	4	28	39
tK(CUU)I	tRNA	7	4	28	39
tK(CUU)J	tRNA	7	4	28	39
tK(CUU)K	tRNA	7	4	28	39
tK(CUU)M	tRNA	7	4	28	39
tK(CUU)P	tRNA	7	4	28	39
tK(UUU)D	tRNA	1	0	4	3
tK(UUU)G1--tK(UUU)G2	tRNA	1	0	4	3
tK(UUU)K	tRNA	1	0	4	3
tK(UUU)L	tRNA	1	0	4	3
tK(UUU)O	tRNA	1	0	4	3
tK(UUU)P	tRNA	1	0	4	3
tK(UUU)Q	tRNA	2	0	0	0
tL(CAA)A	tRNA	0	0	1	0
tL(CAA)C	tRNA	0	0	1	0
tL(CAA)D	tRNA	0	0	1	0
tL(CAA)G1--tL(CAA)G2--tL(CAA)G3	tRNA	0	0	1	0
tL(CAA)K	tRNA	0	0	1	0
tL(CAA)L	tRNA	0	0	1	0
tL(CAA)M	tRNA	0	0	1	0
tL(CAA)N	tRNA	0	0	1	0
tL(UAA)B1--tL(UAA)B2	tRNA	14	4	72	52
tL(UAA)D	tRNA	14	4	72	52
tL(UAA)J	tRNA	14	4	72	52
tL(UAA)K	tRNA	14	4	72	52
tL(UAA)L	tRNA	14	4	72	52
tL(UAA)N	tRNA	14	4	72	52
tM(CAU)C	tRNA	0	4	3	3
tM(CAU)D	tRNA	1	5	16	12
tM(CAU)E	tRNA	0	4	3	3
tM(CAU)J1--YJL007C--tM(CAU)J2	tRNA--mRNA	1	5	16	12
tM(CAU)J3	tRNA	0	4	3	3
tM(CAU)M	tRNA	1	5	16	12
tM(CAU)O1	tRNA	0	4	3	3
tM(CAU)O2	tRNA	1	5	16	12
tM(CAU)P	tRNA	0	4	3	3
tM(CAU)Q2	tRNA	0	1	6	1
tN(GUU)C	tRNA	11	5	28	20
tN(GUU)F	tRNA	11	5	28	20
tN(GUU)G	tRNA	11	5	28	20
tN(GUU)K	tRNA	11	5	28	20
tN(GUU)L	tRNA	11	5	28	20
tN(GUU)N1--tN(GUU)N2	tRNA	11	5	28	20
tN(GUU)O1--tN(GUU)O2	tRNA	11	5	28	20
tN(GUU)P	tRNA	11	5	28	20
tP(AGG)C	tRNA	16	17	29	37
tP(AGG)N	tRNA	16	17	29	37
tQ(CUG)M	tRNA	1	0	0	0
tQ(UUG)B	tRNA	1	4	2	5
tQ(UUG)C	tRNA	0	4	0	6
tQ(UUG)D1--tQ(UUG)D2--tQ(UUG)D3	tRNA	0	4	0	6
tQ(UUG)E1	tRNA	0	4	0	6
tQ(UUG)E2	tRNA	1	0	0	1
tQ(UUG)H	tRNA	0	4	0	6
tQ(UUG)L	tRNA	0	4	0	6
tR(ACG)D	tRNA	1	1	5	10
tR(ACG)E	tRNA	1	1	5	10
tR(ACG)J	tRNA	1	0	3	2
tR(ACG)K	tRNA	1	1	5	10
tR(ACG)L	tRNA	1	1	5	10
tR(ACG)O	tRNA	1	1	5	10
tR(ACG)Q2	tRNA	3	0	0	0
tR(CCG)L	tRNA	0	4	3	1
tR(CCU)J	tRNA	0	1	6	4
tR(UCU)B	tRNA	15	13	25	22
tR(UCU)D	tRNA	15	13	25	22
tR(UCU)E	tRNA	15	13	25	22
tR(UCU)G1--tR(UCU)G3--YGR164W--tR(UCU)G2	tRNA--mRNA	15	13	25	22
tR(UCU)J1--tR(UCU)J2	tRNA	15	13	25	22
tR(UCU)K	tRNA	15	13	25	22
tR(UCU)M2--tR(UCU)M1	tRNA	15	13	25	22
tR(UCU)Q1	tRNA	2	0	0	1
tS(AGA)A	tRNA	17	7	39	30
tS(AGA)B	tRNA	17	7	39	30
tS(AGA)D1--tS(AGA)D2	tRNA	17	7	39	30
tS(AGA)E	tRNA	17	7	39	30
tS(AGA)G	tRNA	17	7	39	30
tS(AGA)H	tRNA	17	7	39	30
tS(AGA)J	tRNA	17	7	39	30
tS(AGA)L	tRNA	17	7	39	30
tS(AGA)M	tRNA	17	7	39	30
tS(GCU)Q1	tRNA	3	0	0	0
tS(UGA)E	tRNA	9	4	31	27
tS(UGA)I	tRNA	9	4	31	27
tS(UGA)P	tRNA	9	4	31	27
tS(UGA)Q2	tRNA	1	1	0	1
tT(AGU)B	tRNA	11	4	22	16
tT(AGU)C	tRNA	11	4	22	16
tT(AGU)D	tRNA	11	4	22	16
tT(AGU)H	tRNA	11	4	22	16
tT(AGU)I1--tT(AGU)I2	tRNA	11	4	22	16
tT(AGU)J	tRNA	11	4	22	16
tT(AGU)N1--tT(AGU)N2	tRNA	11	4	22	16
tT(AGU)O1--tT(AGU)O2	tRNA	11	4	22	16
tT(CGU)K	tRNA	2	0	1	5
tT(UGU)G1--tT(UGU)G2	tRNA	4	1	2	3
tV(AAC)E1--tV(AAC)E2	tRNA	15	3	92	76
tV(AAC)G3--tV(AAC)G1--tV(AAC)G2	tRNA	15	3	92	76
tV(AAC)H	tRNA	15	3	92	76
tV(AAC)J	tRNA	15	3	92	76
tV(AAC)K1--tV(AAC)K2	tRNA	15	3	92	76
tV(AAC)L	tRNA	15	3	92	76
tV(AAC)M1--tV(AAC)M2--tV(AAC)M3	tRNA	15	3	92	76
tV(AAC)O	tRNA	11	3	92	73
tV(CAC)D	tRNA	3	3	7	5
tV(CAC)H	tRNA	3	3	7	5
tV(UAC)B	tRNA	5	3	6	7
tV(UAC)D	tRNA	5	3	6	7
tX(XXX)D	tRNA	17	6	2	6
tX(XXX)D--YDR340W	tRNA--mRNA	2	0	0	0
tY(GUA)Q	tRNA	0	0	1	0
YAL001C	mRNA	769	563	12177	14384
YAL002W	mRNA	543	385	5889	6350
YAL003W	mRNA	4944	4553	158994	169285
YAL005C	mRNA	6628	4991	99693	93199
YAL005C--YAL004W	mRNA	5643	4439	71996	63793
YAL007C	mRNA	400	280	10775	11341
YAL008W	mRNA	90	59	1742	1980
YAL009W	mRNA	104	71	2150	2393
YAL010C	mRNA	233	121	3454	4086
YAL011W	mRNA	300	240	6028	6406
YAL012W	mRNA	3029	2654	67143	70930
YAL013W	mRNA	474	443	9407	9988
YAL014C	mRNA	207	170	5114	6058
YAL015C	mRNA	128	142	3719	4509
YAL016C-A	mRNA	70	69	1978	2016
YAL016C-A--YAL016W	mRNA	15	23	331	403
YAL016C-B	mRNA	4	3	12	10
YAL016W	mRNA	449	377	10346	11351
YAL017W	mRNA	1035	791	9928	11421
YAL018C	mRNA	42	14	30	35
YAL019W	mRNA	1291	1142	17250	19475
YAL019W-A	mRNA	8	6	59	65
YAL020C	mRNA	36	34	934	1112
YAL020C--YAL019W-A	mRNA	103	79	2279	2639
YAL021C	mRNA	1374	1173	11586	13028
YAL022C	mRNA	339	255	7893	9028
YAL023C	mRNA	2718	2292	59514	67404
YAL024C	mRNA	500	378	4030	4318
YAL025C	mRNA	1226	1077	31247	34300
YAL026C	mRNA	933	749	11281	12798
YAL026C--HRA1	mRNA--ncRNA	226	197	2204	2743
YAL026C-A	mRNA	27	16	315	363
YAL026C-A--YAL026C	mRNA	45	32	915	985
YAL027W	mRNA	62	55	1446	1593
YAL027W--YAL026C-A	mRNA	6	5	184	243
YAL028W	mRNA	127	77	1183	1342
YAL029C	mRNA	1544	1337	18897	22171
YAL030W	mRNA	72	48	1452	1381
YAL031C	mRNA	280	188	4442	4925
YAL031W-A	mRNA	3	0	26	41
YAL031W-A--YAL031C	mRNA	44	34	1051	1028
YAL032C	mRNA	352	322	6247	6894
YAL033W	mRNA	186	166	5504	6577
YAL034C	mRNA	300	164	2515	2101
YAL034C-B	mRNA	15	4	65	75
YAL034C-B--YAL034W-A	mRNA	11	7	138	140
YAL034W-A	mRNA	95	81	2038	2441
YAL035W	mRNA	4233	3879	82035	92768
YAL036C	mRNA	695	547	15913	18290
YAL037C-A	mRNA	0	1	12	10
YAL037C-B	mRNA	4	2	56	86
YAL037W	mRNA	63	64	951	1060
YAL038W	mRNA	17494	14463	310054	308097
YAL038W--YAL037C-B	mRNA	44986	40206	785721	825537
YAL039C	mRNA	262	253	6860	7756
YAL040C	mRNA	1850	1539	16367	15127
YAL041W	mRNA	868	782	14011	15190
YAL042C-A	mRNA	7	22	134	231
YAL042C-A--YAL042W	mRNA	107	120	3226	4111
YAL042W	mRNA	608	573	19106	23903
YAL043C	mRNA	910	661	11785	12366
YAL044C	mRNA	312	264	10021	11730
YAL044W-A	mRNA	18	16	671	660
YAL045C	mRNA	6	5	160	176
YAL045C--YAL044W-A	mRNA	91	79	2477	2386
YAL046C	mRNA	51	51	1176	1340
YAL047C	mRNA	148	102	2690	3103
YAL047W-A	mRNA	4	1	4	5
YAL048C	mRNA	241	175	3036	3610
YAL048C--YAL047W-A	mRNA	17	9	131	145
YAL049C	mRNA	217	142	5124	5506
YAL051W	mRNA	772	597	11197	12765
YAL053W	mRNA	611	486	11046	11796
YAL054C	mRNA	168	95	1418	1619
YAL055W	mRNA	87	65	1544	1523
YAL056C-A	mRNA	1	1	21	39
YAL056W	mRNA	446	334	8329	9715
YAL058W	mRNA	191	143	3754	4084
YAL058W--YAL056C-A	mRNA	22	9	580	578
YAL059C-A	mRNA	0	0	4	2
YAL059C-A--YAL059W	mRNA	315	336	10308	12612
YAL059W	mRNA	108	126	3599	4284
YAL060W	mRNA	197	163	4264	4389
YAL061W	mRNA	237	157	3086	2990
YAL062W	mRNA	174	147	2439	2468
YAL063C	mRNA	355	207	1917	2501
YAL063C--YAR050W	mRNA	367	253	1106	1239
YAL063C-A	mRNA	21	6	66	64
YAL064C-A	mRNA	36	19	108	101
YAL064C-A--YAR061W	mRNA	8	1	13	22
YAL064W	mRNA	15	4	35	27
YAL064W-B	mRNA	13	14	78	99
YAL064W-B--YAL063C	mRNA	17	15	98	90
YAL064W-B--YAL063C--YAR050W	mRNA	6	4	15	30
YAL064W-B--YAR050W	mRNA	1	1	9	16
YAL065C	mRNA	8	0	21	25
YAL065C--YAL063C	mRNA	20	7	85	71
YAL065C--YAL063C--YAR050W	mRNA	15	4	58	67
YAL066W	mRNA	10	3	0	0
YAL067C	mRNA	74	16	203	228
YAL067W-A	mRNA	32	9	93	81
YAL068C	mRNA	48	24	466	548
YAL068W-A	mRNA	6	1	2	0
YAL069W	mRNA	62	15	25	26
YAL069W--YAL068W-A	mRNA	8	3	5	5
YAR002C-A	mRNA	800	731	28516	36688
YAR002W	mRNA	729	601	17657	19707
YAR003W	mRNA	122	71	1989	2179
YAR007C	mRNA	312	247	6619	7104
YAR008W	mRNA	249	187	5145	6449
YAR014C	mRNA	820	630	14568	16267
YAR015W	mRNA	428	450	13773	17258
YAR018C	mRNA	223	172	3928	3846
YAR019C	mRNA	383	249	2417	2571
YAR019C--YAR019W-A	mRNA	4	5	19	46
YAR019W-A	mRNA	9	3	12	19
YAR020C	mRNA	4	5	141	191
YAR023C	mRNA	41	18	210	256
YAR027W	mRNA	127	95	3347	3937
YAR028W	mRNA	74	70	1573	1953
YAR029W	mRNA	26	16	530	560
YAR030C	mRNA	24	11	210	246
YAR031W	mRNA	148	111	2875	3367
YAR033W	mRNA	139	82	1719	1927
YAR035C-A	mRNA	0	1	20	14
YAR035W	mRNA	14	23	303	346
YAR042W	mRNA	1853	1509	17138	19509
YAR047C	mRNA	25	22	55	52
YAR050W	mRNA	398	243	1017	1152
YAR053W	mRNA	15	10	136	117
YAR060C	mRNA	18	13	155	168
YAR061W	mRNA	215	122	702	865
YAR064W	mRNA	22	18	142	175
YAR066W	mRNA	145	122	1270	1426
YAR068W	mRNA	166	124	1565	1548
YAR069C	mRNA	13	10	48	29
YAR070C	mRNA	14	3	61	65
YAR071W	mRNA	202	124	3925	4513
YAR073W	mRNA	436	374	9486	10091
YAR073W--YAR075W	mRNA	31	25	498	556
YAR075W	mRNA	267	188	4474	4859
YBL001C	mRNA	72	64	2310	2405
YBL002W	mRNA	977	925	21728	26523
YBL003C	mRNA	116	108	3998	4742
YBL004W	mRNA	3182	2722	18858	24531
YBL005W	mRNA	605	437	7105	7352
YBL006C	mRNA	226	190	6986	8096
YBL006C--YBL006W-A	mRNA	68	53	2977	3144
YBL007C	mRNA	2445	2297	30660	35340
YBL008W	mRNA	413	329	7539	9098
YBL008W-A	mRNA	6	2	11	24
YBL009W	mRNA	364	307	7551	8839
YBL010C	mRNA	155	120	3305	3610
YBL011W	mRNA	936	734	17065	19335
YBL012C	mRNA	39	31	600	834
YBL012C--YBL011W	mRNA	179	165	3792	4554
YBL013W	mRNA	64	58	679	851
YBL014C	mRNA	661	578	12313	14981
YBL015W	mRNA	166	105	3448	3812
YBL016W	mRNA	533	435	13807	15305
YBL017C	mRNA	1798	1573	19627	23268
YBL018C	mRNA	36	27	842	977
YBL019W	mRNA	133	89	2109	2499
YBL020W	mRNA	254	195	6209	7204
YBL021C	mRNA	174	150	5369	6345
YBL022C	mRNA	2122	1708	29901	33874
YBL023C	mRNA	796	704	11434	12883
YBL024W	mRNA	1366	1105	24731	26837
YBL025W	mRNA	83	73	2142	2463
YBL026W	mRNA	82	55	2884	3203
YBL027W	mRNA	2120	2100	70555	84257
YBL027W--YBR084C-A	mRNA	597	547	19088	21484
YBL028C	mRNA	142	110	4479	5186
YBL029C-A	mRNA	57	60	1722	2147
YBL029W	mRNA	143	96	2151	2571
YBL030C	mRNA	376	274	6263	5061
YBL031W	mRNA	154	112	2660	2950
YBL032W	mRNA	350	323	8767	9261
YBL033C	mRNA	411	375	9763	11822
YBL034C	mRNA	650	516	5802	6515
YBL035C	mRNA	345	232	4480	4901
YBL036C	mRNA	512	464	15368	17585
YBL037W	mRNA	505	351	4512	4500
YBL038W	mRNA	194	129	4984	5571
YBL039C	mRNA	2195	1975	37877	44582
YBL039C--YBL039C-A	mRNA	58	54	1085	1155
YBL039W-B	mRNA	9	6	89	111
YBL040C	mRNA	306	224	10061	10888
YBL041W	mRNA	338	275	8618	9073
YBL042C	mRNA	703	519	12732	13231
YBL043W	mRNA	76	38	1637	1631
YBL044W	mRNA	4	5	23	37
YBL045C	mRNA	803	654	19862	22672
YBL046W	mRNA	385	247	7947	8572
YBL047C	mRNA	3870	3290	32119	36625
YBL048W	mRNA	32	29	777	876
YBL049W	mRNA	41	12	434	522
YBL050W	mRNA	396	397	12511	14013
YBL051C	mRNA	2958	2304	18588	19263
YBL052C	mRNA	289	255	5570	6040
YBL053W	mRNA	6	0	3	18
YBL053W--YBL052C	mRNA	146	128	3172	3843
YBL054W	mRNA	1074	931	21115	23486
YBL055C	mRNA	191	150	3965	4512
YBL056W	mRNA	662	525	16384	17621
YBL057C	mRNA	116	114	3703	4164
YBL058W	mRNA	1074	908	25585	27902
YBL059C-A	mRNA	41	29	1307	1423
YBL059W	mRNA	67	38	1319	1372
YBL060W	mRNA	303	220	6049	6857
YBL061C	mRNA	580	602	10069	11715
YBL062W	mRNA	1	0	0	4
YBL062W--YBL061C	mRNA	89	69	1601	1884
YBL063W	mRNA	437	369	4689	5975
YBL064C	mRNA	90	70	2422	2932
YBL065W	mRNA	8	3	43	46
YBL066C	mRNA	750	541	4075	3994
YBL066C--YBL065W	mRNA	16	7	42	57
YBL067C	mRNA	696	475	9644	10282
YBL068W	mRNA	474	307	10425	12163
YBL069W	mRNA	186	115	3485	3846
YBL069W--YBL068W-A	mRNA	60	56	1261	1221
YBL070C	mRNA	28	18	437	379
YBL070C--YBL069W	mRNA	11	17	285	333
YBL071C	mRNA	38	31	1004	1081
YBL071C-B	mRNA	2	4	14	34
YBL071W-A	mRNA	113	88	2634	2890
YBL072C	mRNA	2098	1911	83603	102486
YBL073W	mRNA	11	14	62	84
YBL074C	mRNA	94	61	1071	1207
YBL074C--YBL073W	mRNA	5	10	42	44
YBL075C	mRNA	269	193	4856	4964
YBL076C	mRNA	3815	3123	47939	53729
YBL077W	mRNA	18	15	249	268
YBL077W--YBL076C	mRNA	248	176	3803	4364
YBL078C	mRNA	67	40	1339	1336
YBL079W	mRNA	2360	2087	24786	29557
YBL080C	mRNA	183	144	2868	3284
YBL081W	mRNA	1197	989	9883	10922
YBL081W--YBR112C	mRNA	0	1	9	8
YBL082C	mRNA	257	221	6881	7251
YBL083C	mRNA	5	3	53	59
YBL083C--YBL082C	mRNA	77	58	1488	1718
YBL084C	mRNA	259	198	3312	3497
YBL085W	mRNA	1161	980	22556	25756
YBL086C	mRNA	388	272	7483	7915
YBL087C	mRNA	847	694	30126	34147
YBL088C	mRNA	811	468	3485	3469
YBL089W	mRNA	113	98	1706	1906
YBL090W	mRNA	120	100	3107	3509
YBL091C	mRNA	1228	967	33778	37841
YBL091C-A	mRNA	52	39	1123	1144
YBL092W	mRNA	2050	1629	60473	66736
YBL093C	mRNA	404	399	12177	13753
YBL094C	mRNA	1	0	28	30
YBL095W	mRNA	61	41	913	1093
YBL095W--YBL094C	mRNA	61	72	1026	1240
YBL096C	mRNA	10	7	110	113
YBL096C--YBL095W	mRNA	28	22	348	441
YBL097W	mRNA	612	403	6004	7318
YBL098W	mRNA	107	40	1795	2012
YBL099W	mRNA	783	625	11624	11595
YBL100C	mRNA	28	13	318	286
YBL100C--YBL099W	mRNA	56	63	723	786
YBL100W-C	mRNA	6	11	15	11
YBL101C	mRNA	642	505	2873	2594
YBL102W	mRNA	216	196	6421	7222
YBL103C	mRNA	341	245	5867	6430
YBL104C	mRNA	572	360	6941	7303
YBL105C	mRNA	1454	1213	19202	21223
YBL106C	mRNA	372	255	4262	4702
YBL107C	mRNA	146	86	2882	3225
YBL107W-A	mRNA	62	35	333	397
YBL108C-A	mRNA	28	20	420	515
YBL108W	mRNA	35	12	34	31
YBL109W	mRNA	100	39	242	261
YBL111C	mRNA	4036	3087	38623	42070
YBL112C	mRNA	1416	1216	17528	18724
YBL113C	mRNA	5599	4300	75472	78619
YBL113C--YBL112C	mRNA	23	19	277	263
YBL113C--YBL113W-A	mRNA	2283	2055	35456	37677
YBR001C	mRNA	365	259	5680	5671
YBR002C	mRNA	536	497	12699	14616
YBR003W	mRNA	247	206	5406	5946
YBR004C	mRNA	167	119	3206	3300
YBR005W	mRNA	72	54	1220	1348
YBR006W	mRNA	118	70	1622	1678
YBR007C	mRNA	451	309	5883	6308
YBR008C	mRNA	411	284	7375	7901
YBR009C	mRNA	1083	917	32483	38953
YBR010W	mRNA	590	666	23690	28145
YBR011C	mRNA	9223	7673	187834	197206
YBR012C	mRNA	29	19	457	576
YBR013C	mRNA	48	37	990	1049
YBR014C	mRNA	129	82	3117	3434
YBR015C	mRNA	718	649	14899	15642
YBR016W	mRNA	791	575	13859	13440
YBR017C	mRNA	1292	1053	21677	24555
YBR018C	mRNA	31	13	99	104
YBR019C	mRNA	139	104	918	1034
YBR020W	mRNA	138	108	1320	1321
YBR021W	mRNA	214	130	2562	2447
YBR022W	mRNA	69	58	1679	2057
YBR023C	mRNA	1050	752	16208	19406
YBR024W	mRNA	151	133	3322	3542
YBR025C	mRNA	935	800	24620	27472
YBR026C	mRNA	179	137	4642	4886
YBR027C	mRNA	9	0	59	41
YBR028C	mRNA	458	351	9552	10714
YBR029C	mRNA	323	285	6350	7480
YBR030W	mRNA	253	174	5717	6851
YBR031W	mRNA	5211	4580	118041	122761
YBR032W	mRNA	59	59	910	1060
YBR033W	mRNA	263	174	1284	1448
YBR034C	mRNA	694	597	20497	24395
YBR035C	mRNA	233	182	5826	6467
YBR036C	mRNA	638	594	15416	17507
YBR037C	mRNA	201	160	4774	5143
YBR038W	mRNA	1357	970	14608	14316
YBR039W	mRNA	361	304	11618	12656
YBR040W	mRNA	28	11	134	128
YBR041W	mRNA	609	438	12797	14371
YBR042C	mRNA	201	138	5177	6451
YBR043C	mRNA	223	188	4534	5097
YBR044C	mRNA	231	180	5240	6414
YBR045C	mRNA	71	52	776	935
YBR046C	mRNA	241	200	6099	6159
YBR047W	mRNA	17	12	332	324
YBR048W	mRNA	1810	1713	49949	50805
YBR049C	mRNA	783	690	14157	15056
YBR050C	mRNA	54	38	477	485
YBR050C--YBR051W	mRNA	9	2	27	25
YBR051W	mRNA	3	2	59	64
YBR052C	mRNA	201	144	5249	5502
YBR053C	mRNA	189	131	5475	5841
YBR054W	mRNA	110	82	1843	2070
YBR055C	mRNA	426	299	9223	10877
YBR056W	mRNA	217	137	4217	4193
YBR056W-A	mRNA	3	0	37	51
YBR056W-A--YBR056C-B	mRNA	6	2	24	20
YBR057C	mRNA	245	189	7312	8231
YBR058C	mRNA	387	291	8030	8771
YBR058C-A	mRNA	17	18	811	904
YBR059C	mRNA	1513	1200	17939	18754
YBR060C	mRNA	389	334	7909	8925
YBR061C	mRNA	132	111	3231	3638
YBR062C	mRNA	57	54	2020	2071
YBR063C	mRNA	72	45	1849	2140
YBR063C--YBR064W	mRNA	25	16	336	379
YBR064W	mRNA	0	2	1	12
YBR065C	mRNA	147	113	2871	3372
YBR066C	mRNA	120	92	2822	2866
YBR067C	mRNA	3802	2980	77226	78794
YBR068C	mRNA	2611	2326	48010	52631
YBR069C	mRNA	1304	1087	33618	38259
YBR070C	mRNA	73	35	1299	1491
YBR071W	mRNA	93	73	1653	1695
YBR072C-A	mRNA	2	3	22	18
YBR072W	mRNA	47	31	787	750
YBR073W	mRNA	1166	1037	22704	26874
YBR074W	mRNA	731	674	11215	12542
YBR076C-A	mRNA	15	9	253	354
YBR076W	mRNA	46	27	277	337
YBR077C	mRNA	63	54	1736	1981
YBR078W	mRNA	2847	2479	46291	47875
YBR079C	mRNA	3006	2675	62964	71219
YBR080C	mRNA	700	592	11555	11775
YBR081C	mRNA	1133	881	14968	17650
YBR082C	mRNA	1611	1220	48037	52653
YBR083W	mRNA	783	676	12029	12726
YBR084C-A	mRNA	2589	2515	77122	87066
YBR084W	mRNA	2084	1810	39558	49615
YBR085C-A	mRNA	138	127	4360	4711
YBR085W	mRNA	87	47	1337	1563
YBR086C	mRNA	1977	1680	25170	29250
YBR087W	mRNA	95	96	3048	3316
YBR088C	mRNA	54	25	1338	1463
YBR088C--YBR089W	mRNA	131	98	3779	4035
YBR089C-A	mRNA	25	22	858	877
YBR089C-A--YBR090C	mRNA	25	30	830	888
YBR089W	mRNA	0	1	22	21
YBR090C	mRNA	30	41	878	864
YBR091C	mRNA	66	59	1730	1894
YBR092C	mRNA	1097	1034	29821	34070
YBR092C--YBR093C	mRNA	136	102	3590	4099
YBR093C	mRNA	129	87	2197	2371
YBR094W	mRNA	471	340	9787	10848
YBR095C	mRNA	176	127	4757	5481
YBR096W	mRNA	207	177	6870	7794
YBR097W	mRNA	402	281	3158	3723
YBR098W	mRNA	135	108	1510	1595
YBR098W--YBR099C	mRNA	22	20	200	234
YBR101C	mRNA	590	460	15391	15652
YBR102C	mRNA	418	388	6075	6961
YBR103C-A	mRNA	3	1	25	27
YBR103W	mRNA	344	265	7274	8763
YBR104W	mRNA	226	182	5381	6488
YBR105C	mRNA	958	742	18792	18930
YBR106W	mRNA	339	261	11336	12594
YBR107C	mRNA	82	58	1596	1764
YBR108W	mRNA	629	573	8005	8384
YBR109C	mRNA	244	211	7413	7520
YBR109W-A	mRNA	13	11	149	189
YBR110W	mRNA	370	272	10227	10779
YBR111C	mRNA	194	149	5680	6170
YBR111W-A	mRNA	11	9	457	470
YBR112C	mRNA	2843	2647	25409	24269
YBR112C--YBR113W	mRNA	154	118	986	899
YBR113W	mRNA	274	210	1966	1731
YBR114W	mRNA	439	301	6754	7505
YBR115C	mRNA	1465	1282	12682	15880
YBR116C	mRNA	8	6	26	32
YBR116C--YBR117C	mRNA	12	15	119	129
YBR117C	mRNA	122	75	970	970
YBR118W	mRNA	54677	49557	1258443	1328564
YBR119W	mRNA	101	74	1772	1984
YBR120C	mRNA	58	24	1250	1423
YBR121C	mRNA	1884	1612	55437	60697
YBR121C--YBR121C-A	mRNA	17	29	799	853
YBR122C	mRNA	171	201	7183	7529
YBR123C	mRNA	346	247	6731	7035
YBR123C--YBR124W	mRNA	22	23	301	327
YBR124W	mRNA	31	29	366	435
YBR125C	mRNA	207	178	4820	5440
YBR126C	mRNA	1083	902	18110	16727
YBR126W-A	mRNA	24	33	1019	1222
YBR126W-A--YBR126W-B	mRNA	52	53	2138	2401
YBR126W-B	mRNA	7	6	247	298
YBR127C	mRNA	2999	2666	59939	69359
YBR128C	mRNA	65	28	687	786
YBR129C	mRNA	156	123	4169	4595
YBR130C	mRNA	413	360	10599	11189
YBR131W	mRNA	325	243	4756	4878
YBR131W--YBR131C-A	mRNA	7	7	82	105
YBR132C	mRNA	237	142	1806	1534
YBR133C	mRNA	929	655	12608	14951
YBR134W	mRNA	30	18	179	223
YBR135W	mRNA	153	214	4191	5586
YBR136W	mRNA	806	602	3971	4706
YBR137W	mRNA	63	33	1953	2149
YBR138C	mRNA	127	96	2282	2358
YBR139W	mRNA	414	287	6935	6887
YBR140C	mRNA	2664	2291	8501	10349
YBR141C	mRNA	168	113	2357	2698
YBR141C--YBR141W-A	mRNA	8	7	80	111
YBR142W	mRNA	927	745	18318	21417
YBR143C	mRNA	2178	1843	60618	70070
YBR144C	mRNA	7	3	29	42
YBR145W	mRNA	70	66	1498	1650
YBR146W	mRNA	270	221	6977	7576
YBR147W	mRNA	32	19	196	202
YBR148W	mRNA	109	46	727	752
YBR149W	mRNA	560	446	14126	13701
YBR150C	mRNA	349	233	3786	3803
YBR151W	mRNA	2363	1975	65679	77648
YBR152W	mRNA	137	115	1955	2034
YBR153W	mRNA	106	79	2527	3024
YBR154C	mRNA	382	269	11919	14042
YBR155W	mRNA	486	359	7806	6800
YBR156C	mRNA	305	195	3265	3431
YBR157C	mRNA	114	98	2424	2670
YBR158W	mRNA	1512	1236	41684	49776
YBR159W	mRNA	426	365	12639	14418
YBR160W	mRNA	189	163	5626	6096
YBR161W	mRNA	111	95	2792	2920
YBR162C	mRNA	2529	2263	37021	41271
YBR162W-A	mRNA	263	274	7399	8490
YBR163W	mRNA	266	229	5158	5629
YBR164C	mRNA	218	178	6565	7152
YBR165W	mRNA	160	101	3286	3581
YBR166C	mRNA	291	220	7927	8546
YBR167C	mRNA	43	31	525	577
YBR168W	mRNA	79	67	1665	1951
YBR169C	mRNA	319	202	4270	4107
YBR170C	mRNA	436	342	7414	7417
YBR171W	mRNA	395	398	13527	14884
YBR172C	mRNA	1193	965	26446	29872
YBR173C	mRNA	576	495	13710	15345
YBR174C	mRNA	5	4	86	109
YBR174C--YBR175W	mRNA	72	53	2006	2388
YBR175W	mRNA	108	87	2662	3414
YBR176W	mRNA	108	60	1789	2130
YBR177C	mRNA	355	299	9319	9959
YBR177C--YBR178W	mRNA	11	4	157	148
YBR178W	mRNA	13	10	160	153
YBR179C	mRNA	463	379	8574	9777
YBR180W	mRNA	79	35	225	228
YBR181C	mRNA	2901	2757	102775	126170
YBR182C	mRNA	85	42	661	668
YBR182C-A	mRNA	2	3	22	25
YBR183W	mRNA	69	26	1154	1197
YBR184W	mRNA	83	44	652	741
YBR185C	mRNA	88	45	1923	1964
YBR186W	mRNA	76	42	667	758
YBR187W	mRNA	196	169	5363	6280
YBR188C	mRNA	50	36	976	1094
YBR189W	mRNA	1938	1615	69469	82691
YBR190W	mRNA	1	3	10	20
YBR191W	mRNA	2314	1965	80205	94811
YBR191W-A	mRNA	1	1	6	15
YBR192W	mRNA	181	149	4281	4904
YBR193C	mRNA	105	80	2741	2866
YBR194W	mRNA	65	48	1365	1449
YBR195C	mRNA	128	89	1731	1928
YBR196C	mRNA	5766	4893	140946	163847
YBR196C-A	mRNA	5	3	50	52
YBR196C-B	mRNA	7	3	103	95
YBR197C	mRNA	92	80	1868	2128
YBR198C	mRNA	1154	931	18587	18300
YBR199W	mRNA	609	474	18850	21433
YBR200W	mRNA	585	443	11943	13768
YBR200W-A	mRNA	4	1	19	17
YBR201C-A	mRNA	18	10	453	524
YBR201W	mRNA	92	54	1905	2211
YBR202W	mRNA	1020	789	15134	16109
YBR203W	mRNA	211	169	1893	2251
YBR204C	mRNA	112	110	2568	2526
YBR205W	mRNA	510	409	13674	15411
YBR205W--YBR206W	mRNA	85	51	1793	1877
YBR206W	mRNA	51	42	1369	1628
YBR207W	mRNA	602	403	12179	13664
YBR208C	mRNA	727	562	6774	8689
YBR209W	mRNA	8	4	16	20
YBR210W	mRNA	75	66	2204	2547
YBR211C	mRNA	126	101	3414	3837
YBR212W	mRNA	781	520	6858	6796
YBR213W	mRNA	103	61	1829	1379
YBR214W	mRNA	261	216	4056	4035
YBR215W	mRNA	316	215	5383	6126
YBR216C	mRNA	215	167	3168	3527
YBR217W	mRNA	27	32	934	1172
YBR218C	mRNA	1932	1678	23967	26237
YBR219C	mRNA	0	0	10	4
YBR219C--YBR220C	mRNA	34	30	853	863
YBR220C	mRNA	261	187	5234	5794
YBR221C	mRNA	953	860	26829	28567
YBR221W-A	mRNA	1	0	0	2
YBR222C	mRNA	442	369	11039	12789
YBR223C	mRNA	107	93	1535	1469
YBR223C--YBR223W-A	mRNA	2	1	47	71
YBR223C--YBR224W	mRNA	8	6	73	56
YBR224W	mRNA	18	15	90	83
YBR225W	mRNA	484	429	4968	5383
YBR225W--YBR226C	mRNA	11	13	172	176
YBR226C	mRNA	8	10	134	120
YBR227C	mRNA	337	271	7418	7675
YBR228W	mRNA	151	115	2665	2906
YBR229C	mRNA	782	665	13217	14630
YBR230C	mRNA	97	76	2199	2229
YBR230W-A	mRNA	18	12	363	337
YBR231C	mRNA	149	108	2653	2908
YBR232C	mRNA	15	17	284	342
YBR232C--YBR233W	mRNA	137	109	2606	2938
YBR233W	mRNA	242	163	5267	5530
YBR233W-A	mRNA	101	107	3485	3593
YBR234C	mRNA	503	420	12570	13112
YBR235W	mRNA	576	445	6317	7163
YBR236C	mRNA	158	116	3096	3374
YBR237W	mRNA	500	338	7952	9299
YBR238C	mRNA	1425	1160	7211	7221
YBR239C	mRNA	329	243	3256	2960
YBR240C	mRNA	76	35	561	555
YBR241C	mRNA	162	135	2871	3077
YBR242W	mRNA	127	79	3028	3464
YBR243C	mRNA	377	280	8753	9504
YBR244W	mRNA	396	328	12608	15637
YBR245C	mRNA	1089	822	16907	18282
YBR246W	mRNA	320	244	7399	7785
YBR247C	mRNA	505	493	15862	17974
YBR248C	mRNA	821	661	19736	24011
YBR249C	mRNA	973	1034	36704	43986
YBR250W	mRNA	65	35	311	295
YBR251W	mRNA	228	217	5195	5880
YBR252W	mRNA	273	215	7892	8684
YBR253W	mRNA	64	50	1449	1599
YBR254C	mRNA	80	78	2074	2268
YBR255C-A	mRNA	57	49	1369	1543
YBR255W	mRNA	280	243	4521	5115
YBR256C	mRNA	153	112	4160	4585
YBR257W	mRNA	87	63	1886	1946
YBR258C	mRNA	112	78	2724	3020
YBR259W	mRNA	195	91	2594	3012
YBR260C	mRNA	477	348	7523	8241
YBR261C	mRNA	151	192	5728	6151
YBR262C	mRNA	88	67	2329	2621
YBR263W	mRNA	1441	1222	18613	21006
YBR264C	mRNA	181	143	3793	4209
YBR265W	mRNA	200	174	5261	5294
YBR267W	mRNA	359	287	8311	8448
YBR267W--YBR266C	mRNA	231	217	5558	5986
YBR268W	mRNA	143	132	4293	4531
YBR269C	mRNA	173	124	4707	4555
YBR270C	mRNA	166	133	2936	3333
YBR271W	mRNA	249	195	5748	6799
YBR272C	mRNA	228	181	4712	4827
YBR273C	mRNA	279	224	5517	6222
YBR274W	mRNA	118	99	2049	2276
YBR275C	mRNA	1056	829	11476	13766
YBR276C	mRNA	550	451	11266	13129
YBR277C	mRNA	2	2	43	47
YBR277C--YBR278W	mRNA	44	31	1071	1134
YBR278W	mRNA	39	26	526	619
YBR279W	mRNA	1099	823	22309	24591
YBR280C	mRNA	177	100	1807	1734
YBR281C	mRNA	474	375	7949	8891
YBR282W	mRNA	104	84	2899	3011
YBR283C	mRNA	1514	1213	36837	37305
YBR284W	mRNA	96	32	394	397
YBR285W	mRNA	19	21	170	150
YBR286W	mRNA	6172	5123	167347	190688
YBR287W	mRNA	294	193	4954	5394
YBR288C	mRNA	236	221	5974	6876
YBR289W	mRNA	932	668	10549	11679
YBR290W	mRNA	296	206	6057	7105
YBR291C	mRNA	102	76	1921	2430
YBR292C	mRNA	13	8	129	110
YBR293W	mRNA	116	61	1634	1845
YBR294W	mRNA	319	200	3971	4221
YBR295W	mRNA	356	194	2125	2278
YBR296C	mRNA	115	45	268	320
YBR296C-A	mRNA	7	1	18	27
YBR297W	mRNA	172	118	2146	2418
YBR298C	mRNA	216	180	4073	4787
YBR298C-A	mRNA	8	4	10	11
YBR299W	mRNA	203	74	905	979
YBR300C	mRNA	69	23	606	628
YBR301W	mRNA	74	47	795	845
YBR302C	mRNA	344	214	6700	6909
YCL001W	mRNA	136	109	4707	5079
YCL001W-A	mRNA	9	3	22	23
YCL001W-B	mRNA	11	5	45	49
YCL002C	mRNA	91	67	1853	2165
YCL004W	mRNA	117	90	1592	1733
YCL005W	mRNA	215	173	5320	5916
YCL005W-A	mRNA	109	93	3312	3833
YCL007C	mRNA	52	36	803	999
YCL007C--YCL005W-A	mRNA	37	27	1080	1258
YCL008C	mRNA	308	249	4056	3954
YCL009C	mRNA	1542	1454	31750	31294
YCL010C	mRNA	187	120	3071	3620
YCL011C	mRNA	1240	1388	36672	43557
YCL012C	mRNA	52	22	1042	987
YCL014W	mRNA	978	783	5744	6305
YCL016C	mRNA	71	51	1347	1498
YCL017C	mRNA	424	345	8354	9283
YCL021W-A	mRNA	253	220	1866	2347
YCL023C	mRNA	11	4	70	84
YCL023C--YCL024W	mRNA	10	3	76	103
YCL024W	mRNA	389	274	5116	6013
YCL024W--YCL022C	mRNA	94	82	1723	1938
YCL025C	mRNA	323	219	6295	6511
YCL026C-A	mRNA	18	6	102	120
YCL026C-B	mRNA	54	47	738	806
YCL027W	mRNA	294	213	5949	6712
YCL028W	mRNA	908	795	13808	14647
YCL029C	mRNA	275	217	5787	6594
YCL030C	mRNA	417	336	7282	9414
YCL031C	mRNA	665	579	19238	22237
YCL032W	mRNA	162	114	3222	3399
YCL033C	mRNA	49	48	1695	1843
YCL034W	mRNA	324	348	8697	9728
YCL035C	mRNA	153	141	5116	5627
YCL036W	mRNA	521	493	12898	15316
YCL037C	mRNA	2917	2390	5318	5600
YCL038C	mRNA	130	69	1180	1159
YCL039W	mRNA	679	515	7236	7663
YCL040W	mRNA	1130	839	28528	27691
YCL041C	mRNA	36	16	407	434
YCL042W	mRNA	38	34	1110	968
YCL042W--YCL040W	mRNA	18	12	503	525
YCL043C	mRNA	6573	5757	97646	91221
YCL043C--YCL041C	mRNA	20	30	322	322
YCL044C	mRNA	767	604	7382	7205
YCL045C	mRNA	1102	883	23168	26292
YCL045C--YCL046W	mRNA	173	167	3721	3709
YCL046W	mRNA	37	24	549	576
YCL047C	mRNA	142	89	3276	3458
YCL048W	mRNA	52	26	103	106
YCL048W-A	mRNA	4	4	26	28
YCL049C	mRNA	130	98	3219	3637
YCL050C	mRNA	952	733	18868	18725
YCL051W	mRNA	348	235	5779	6527
YCL052C	mRNA	369	289	8190	9767
YCL054W	mRNA	1395	1160	30649	35577
YCL054W-A	mRNA	9	8	223	260
YCL055W	mRNA	132	79	3386	3983
YCL056C	mRNA	121	89	2719	2826
YCL057C-A	mRNA	106	88	2336	2467
YCL057W	mRNA	1219	988	20299	20246
YCL058C	mRNA	10	4	186	232
YCL058C--YCL058W-A	mRNA	92	65	1556	1778
YCL059C	mRNA	269	235	8545	9753
YCL061C	mRNA	713	549	7683	8613
YCL063W	mRNA	352	316	6523	6864
YCL064C	mRNA	908	713	21213	22271
YCL065W	mRNA	2	0	0	4
YCL065W--YCR041W	mRNA	17	15	130	138
YCL065W--YCR041W--YCR097W-A	mRNA	13	8	43	54
YCL066W--YCL065W--YCR040W--YCR041W--YCR097W-A	mRNA	2	2	5	5
YCL066W--YCR040W	mRNA	16	4	15	18
YCL067C--YCR039C	mRNA	74	43	1808	1972
YCL067C--YCR039C--YCR096C	mRNA	153	115	3613	4327
YCL068C	mRNA	3	3	0	0
YCL068C--YCR038C	mRNA	110	53	291	265
YCL068C--YCR038C--YCR038W-A	mRNA	3	2	16	12
YCL069W	mRNA	169	72	911	1004
YCL073C	mRNA	127	58	758	722
YCL074W	mRNA	36	13	1	0
YCL075W	mRNA	10	5	0	0
YCL076W	mRNA	10	2	0	1
YCR001W	mRNA	15	5	73	83
YCR002C	mRNA	331	258	6110	6908
YCR003W	mRNA	145	93	4313	4631
YCR004C	mRNA	411	366	13028	14615
YCR005C	mRNA	372	250	8301	8193
YCR006C	mRNA	30	29	552	729
YCR007C	mRNA	51	30	696	713
YCR008W	mRNA	990	871	15351	16990
YCR009C	mRNA	617	534	17908	19834
YCR010C	mRNA	51	33	355	350
YCR011C	mRNA	997	786	17940	20411
YCR012W	mRNA	6767	5681	165096	160261
YCR012W--YCR013C	mRNA	1714	1469	45160	50654
YCR013C	mRNA	40	43	1098	1307
YCR014C	mRNA	313	254	5544	6785
YCR015C	mRNA	62	46	1262	1353
YCR016W	mRNA	522	478	14512	17596
YCR017C	mRNA	917	800	16958	18865
YCR018C	mRNA	244	196	6072	6957
YCR018C-A	mRNA	456	273	2602	3069
YCR019W	mRNA	119	103	2525	2824
YCR020C	mRNA	43	20	497	507
YCR020C-A	mRNA	15	6	607	717
YCR020W-B	mRNA	7	1	193	226
YCR021C	mRNA	80	48	912	1112
YCR022C	mRNA	19	9	184	217
YCR023C	mRNA	180	108	2228	2379
YCR024C	mRNA	256	178	3319	3385
YCR024C-A	mRNA	189	170	4433	4449
YCR024C-B	mRNA	280	174	4906	4875
YCR025C	mRNA	21	15	178	201
YCR026C	mRNA	522	396	9460	10841
YCR027C	mRNA	137	86	2982	3237
YCR028C	mRNA	304	218	4840	5215
YCR028C-A	mRNA	208	190	7040	7542
YCR030C	mRNA	1185	945	9961	10157
YCR031C	mRNA	1547	1412	41913	45813
YCR032W	mRNA	725	589	6617	7386
YCR033W	mRNA	1569	1366	22913	26826
YCR034W	mRNA	208	159	4799	5055
YCR035C	mRNA	419	310	9583	10386
YCR036W	mRNA	427	337	11584	12345
YCR037C	mRNA	510	439	9778	10355
YCR038C	mRNA	182	101	1248	1359
YCR038C--YCR038W-A	mRNA	4	1	23	29
YCR041W	mRNA	7	3	55	56
YCR041W--YCR042C	mRNA	4	2	29	9
YCR042C	mRNA	840	608	8434	8673
YCR043C	mRNA	78	54	2862	3338
YCR044C	mRNA	260	188	5114	5486
YCR045C	mRNA	97	89	1698	2024
YCR045C--YCR045W-A	mRNA	16	26	633	667
YCR046C	mRNA	354	286	9075	9036
YCR047C	mRNA	445	426	11519	13781
YCR047C--YCR047W-A	mRNA	167	183	4870	5526
YCR048W	mRNA	396	420	11335	13530
YCR048W--YCR050C	mRNA	46	26	898	1055
YCR049C	mRNA	5	6	209	233
YCR049C--YCR048W	mRNA	57	104	1939	2339
YCR050C	mRNA	0	0	23	21
YCR051W	mRNA	461	406	11591	13129
YCR052W	mRNA	788	713	19708	21749
YCR053W	mRNA	1883	1460	25672	26506
YCR054C	mRNA	233	166	4168	4821
YCR057C	mRNA	1248	1244	21528	24243
YCR059C	mRNA	155	136	4469	4971
YCR060W	mRNA	55	40	1637	2111
YCR061W	mRNA	627	448	2630	2702
YCR063W	mRNA	35	31	302	314
YCR064C	mRNA	27	15	256	158
YCR064C--YCR063W	mRNA	51	57	521	537
YCR065W	mRNA	743	611	6645	6530
YCR066W	mRNA	127	84	2270	2364
YCR067C	mRNA	1152	899	14051	16183
YCR068W	mRNA	218	184	3351	3338
YCR069W	mRNA	499	376	10584	11508
YCR071C	mRNA	219	176	5930	6724
YCR072C	mRNA	721	632	16006	18380
YCR073C	mRNA	536	399	5460	6309
YCR073W-A	mRNA	261	211	5333	5582
YCR075C	mRNA	41	25	838	874
YCR075W-A	mRNA	32	8	123	140
YCR076C	mRNA	108	71	2926	3234
YCR077C	mRNA	1518	1352	22754	25156
YCR079W	mRNA	151	138	2936	3439
YCR081W	mRNA	452	349	4298	4988
YCR081W--YCR081C-A	mRNA	8	11	210	237
YCR082W	mRNA	199	183	6821	7410
YCR083W	mRNA	37	30	1131	1310
YCR084C	mRNA	3960	3396	36427	38523
YCR085W	mRNA	16	10	165	179
YCR086W	mRNA	120	73	1651	1859
YCR087W	mRNA	18	5	207	289
YCR087W--YCR087C-A	mRNA	621	575	15830	18658
YCR088W	mRNA	1596	1337	24767	25730
YCR089W	mRNA	1190	868	5739	5980
YCR090C	mRNA	132	123	4206	4828
YCR091W	mRNA	244	154	1541	1850
YCR092C	mRNA	358	242	3935	4417
YCR093W	mRNA	2967	2534	17306	18898
YCR094W	mRNA	205	170	3985	3759
YCR095C	mRNA	266	191	6640	7719
YCR095W-A	mRNA	5	4	68	48
YCR097W	mRNA	63	33	1217	1406
YCR097W-A	mRNA	3	0	0	0
YCR098C	mRNA	96	32	215	310
YCR099C	mRNA	24	14	265	295
YCR100C	mRNA	54	28	677	749
YCR101C	mRNA	41	37	295	317
YCR102C	mRNA	74	41	1125	1420
YCR102W-A	mRNA	5	2	30	43
YCR104W	mRNA	8	7	34	43
YCR105W	mRNA	105	60	1226	1232
YCR106W	mRNA	239	166	2456	2479
YCR107W	mRNA	127	61	1589	1771
YCR108C	mRNA	59	18	42	38
YDL001W	mRNA	277	225	5713	6194
YDL002C	mRNA	94	71	2357	2709
YDL003W	mRNA	553	452	14414	16754
YDL004W	mRNA	142	103	4366	4454
YDL005C	mRNA	548	469	11832	13663
YDL006W	mRNA	159	115	3809	4374
YDL007C-A	mRNA	2	1	5	8
YDL007W	mRNA	1398	1289	42588	46453
YDL008W	mRNA	76	66	1977	2391
YDL009C	mRNA	15	13	158	156
YDL010W	mRNA	42	39	906	1060
YDL010W--YDL009C	mRNA	6	2	87	79
YDL011C	mRNA	6	3	96	105
YDL011C--YDL010W	mRNA	80	62	1770	1819
YDL012C	mRNA	571	508	9891	11471
YDL013W	mRNA	449	371	9004	10031
YDL014W	mRNA	1199	1124	33735	38196
YDL015C	mRNA	376	303	12432	14072
YDL016C	mRNA	6	7	24	35
YDL017W	mRNA	182	126	2863	3169
YDL017W--YDL016C	mRNA	7	10	92	117
YDL018C	mRNA	67	52	1670	1938
YDL019C	mRNA	1246	1001	16465	18319
YDL020C	mRNA	1057	819	24960	27954
YDL021W	mRNA	56	29	944	973
YDL022C-A	mRNA	11	8	4	6
YDL022W	mRNA	672	583	14621	15424
YDL023C	mRNA	79	65	1375	1674
YDL023C--YDL022W	mRNA	194	203	5018	5067
YDL024C	mRNA	62	23	188	167
YDL025C	mRNA	318	228	6351	7351
YDL025C--YDL025W-A	mRNA	8	7	157	181
YDL026W	mRNA	7	2	44	40
YDL027C	mRNA	120	108	2462	2700
YDL027C--YDL026W	mRNA	16	15	187	188
YDL028C	mRNA	399	332	6744	6736
YDL029W	mRNA	452	328	12369	13712
YDL030W	mRNA	346	307	8191	9198
YDL031W	mRNA	1120	888	20819	21703
YDL032W	mRNA	8	1	39	43
YDL033C	mRNA	153	141	1584	1780
YDL033C--YDL032W	mRNA	58	43	408	469
YDL034W	mRNA	9	5	118	97
YDL035C	mRNA	684	503	12446	13442
YDL035C--YDL034W	mRNA	20	18	349	337
YDL036C	mRNA	354	277	7833	8941
YDL037C	mRNA	937	976	7873	10295
YDL039C	mRNA	2592	2546	29764	39626
YDL040C	mRNA	1668	1325	37013	39501
YDL041W	mRNA	6	1	36	57
YDL042C	mRNA	151	116	2852	2904
YDL042C--YDL041W	mRNA	67	55	990	1052
YDL043C	mRNA	82	42	1340	1321
YDL044C	mRNA	122	134	2180	2675
YDL045C	mRNA	183	182	4838	5565
YDL045W-A	mRNA	69	47	1857	1842
YDL046W	mRNA	498	386	10883	12047
YDL047W	mRNA	472	402	12346	13858
YDL048C	mRNA	1642	1395	29091	33733
YDL049C	mRNA	66	43	1178	1281
YDL050C	mRNA	7	7	109	148
YDL051W	mRNA	424	341	13138	14842
YDL051W--YDL050C	mRNA	370	326	12177	13512
YDL052C	mRNA	926	723	18673	17904
YDL053C	mRNA	209	177	4759	4689
YDL054C	mRNA	163	137	2910	3181
YDL055C	mRNA	3081	2718	110110	141561
YDL056W	mRNA	485	394	8385	9190
YDL057W	mRNA	120	86	2634	2921
YDL058W	mRNA	1598	1272	14437	16865
YDL059C	mRNA	68	48	1263	1524
YDL060W	mRNA	1320	1157	28011	33873
YDL061C	mRNA	222	235	7386	7351
YDL062W	mRNA	12	11	196	207
YDL063C	mRNA	288	244	6706	7228
YDL063C--YDL062W	mRNA	30	27	407	519
YDL064W	mRNA	146	123	4377	4650
YDL065C	mRNA	307	241	7027	7526
YDL066W	mRNA	994	910	12165	15224
YDL067C	mRNA	78	66	2080	2493
YDL068W	mRNA	0	0	9	8
YDL069C	mRNA	10	10	86	95
YDL069C--YDL068W	mRNA	11	1	103	93
YDL070W	mRNA	1399	1275	34945	38669
YDL071C	mRNA	33	11	452	502
YDL072C	mRNA	215	179	6363	6786
YDL073W	mRNA	428	392	9855	11158
YDL074C	mRNA	435	339	10474	11918
YDL075W	mRNA	1641	1413	49883	57078
YDL076C	mRNA	116	139	3993	4561
YDL077C	mRNA	319	244	4842	5317
YDL078C	mRNA	300	253	8671	11389
YDL079C	mRNA	163	81	1849	2006
YDL080C	mRNA	215	176	4935	5998
YDL081C	mRNA	662	1253	32071	50020
YDL082W	mRNA	1975	1831	65232	74808
YDL083C	mRNA	619	528	16818	19305
YDL084W	mRNA	1602	1458	50669	58248
YDL085C-A	mRNA	117	93	3404	3980
YDL085W	mRNA	92	46	431	444
YDL086W	mRNA	81	71	1970	2267
YDL086W--YDL086C-A	mRNA	152	137	5169	5253
YDL087C	mRNA	89	49	1025	1117
YDL088C	mRNA	621	458	9803	10832
YDL089W	mRNA	154	142	2745	2951
YDL090C	mRNA	166	129	4095	4728
YDL091C	mRNA	185	130	3448	3451
YDL092W	mRNA	547	555	16525	20762
YDL093W	mRNA	391	292	5644	6369
YDL094C	mRNA	10	14	72	83
YDL094C--YDL093W	mRNA	7	2	47	67
YDL095W	mRNA	2374	2089	38091	45361
YDL096C	mRNA	37	24	517	574
YDL096C--YDL095W	mRNA	96	106	1514	1703
YDL097C	mRNA	725	625	20125	21781
YDL098C	mRNA	114	73	2132	2339
YDL099W	mRNA	442	260	10938	11388
YDL100C	mRNA	971	841	27261	29327
YDL101C	mRNA	107	75	2380	2496
YDL102W	mRNA	587	472	9942	11004
YDL103C	mRNA	309	270	8210	8994
YDL104C	mRNA	73	39	1162	1228
YDL105W	mRNA	95	59	1774	1930
YDL106C	mRNA	304	229	3876	4046
YDL107W	mRNA	110	80	1989	2254
YDL108W	mRNA	127	120	3605	4132
YDL109C	mRNA	160	124	1971	2269
YDL110C	mRNA	220	154	5952	6470
YDL111C	mRNA	242	188	7152	7899
YDL112W	mRNA	1687	1418	17333	20215
YDL113C	mRNA	248	158	3716	4195
YDL114W	mRNA	28	14	41	38
YDL114W-A	mRNA	15	7	156	243
YDL115C	mRNA	188	141	3830	4412
YDL116W	mRNA	531	472	9789	11107
YDL117W	mRNA	515	430	11960	12795
YDL118W	mRNA	20	23	384	405
YDL119C	mRNA	81	49	1847	1869
YDL119C--YDL118W	mRNA	25	11	312	312
YDL120W	mRNA	168	135	3849	4328
YDL121C	mRNA	184	155	5361	6609
YDL122W	mRNA	1385	1226	29057	32166
YDL123W	mRNA	175	131	3982	4010
YDL124W	mRNA	1799	1338	33803	30790
YDL125C	mRNA	305	250	9470	11023
YDL126C	mRNA	4308	3626	78760	90017
YDL127W	mRNA	229	166	1899	1748
YDL128W	mRNA	602	444	13457	14070
YDL129W	mRNA	123	105	2987	3583
YDL130W	mRNA	510	578	16051	19523
YDL130W-A	mRNA	53	35	1022	1162
YDL131W	mRNA	294	277	4589	4135
YDL132W	mRNA	1216	1031	21927	24210
YDL133C-A	mRNA	11	7	435	539
YDL133W	mRNA	246	200	5064	5826
YDL134C	mRNA	328	247	8817	9940
YDL135C	mRNA	322	279	8907	10152
YDL136W	mRNA	165	136	6061	6485
YDL137W	mRNA	256	192	8295	8980
YDL138W	mRNA	420	308	5882	6285
YDL139C	mRNA	103	79	1629	1948
YDL140C	mRNA	7978	7223	35772	38005
YDL141W	mRNA	479	426	8848	9780
YDL142C	mRNA	109	63	2567	2724
YDL143W	mRNA	1092	872	25649	30174
YDL144C	mRNA	267	219	6195	6456
YDL145C	mRNA	4061	3470	55712	65499
YDL146W	mRNA	88	75	1745	1729
YDL147W	mRNA	1286	1277	38877	43370
YDL148C	mRNA	1308	1078	27167	30508
YDL149W	mRNA	194	165	2801	2988
YDL150W	mRNA	302	260	8927	9699
YDL151C	mRNA	2	4	97	124
YDL151C--YDL150W	mRNA	400	337	9909	11858
YDL152W	mRNA	10	4	116	163
YDL153C	mRNA	1108	1030	27576	31458
YDL153C--YDL152W	mRNA	75	60	1726	2078
YDL154W	mRNA	166	112	1927	2141
YDL155W	mRNA	363	293	7906	8973
YDL156W	mRNA	266	195	3497	3936
YDL157C	mRNA	91	42	2204	2568
YDL158C	mRNA	19	7	273	290
YDL159W	mRNA	176	153	2802	2589
YDL159W--YDL158C	mRNA	12	6	165	151
YDL159W--YDL159C-B	mRNA	14	7	78	49
YDL159W-A	mRNA	5	1	4	1
YDL160C	mRNA	1844	1578	23906	27947
YDL160C-A	mRNA	22	18	376	389
YDL161W	mRNA	1296	1062	27307	30939
YDL162C	mRNA	10	8	42	33
YDL163W	mRNA	0	0	5	5
YDL164C	mRNA	442	376	9176	10288
YDL164C--YDL163W	mRNA	69	44	861	1002
YDL165W	mRNA	140	81	3584	4362
YDL166C	mRNA	165	148	4642	5281
YDL167C	mRNA	1123	1052	21692	24962
YDL168W	mRNA	339	280	8582	9800
YDL169C	mRNA	53	46	760	751
YDL170W	mRNA	156	127	2588	2860
YDL171C	mRNA	2850	2676	9662	12345
YDL172C	mRNA	0	0	9	8
YDL173W	mRNA	169	130	4744	4994
YDL173W--YDL172C	mRNA	181	180	6266	6587
YDL174C	mRNA	514	377	9443	9290
YDL175C	mRNA	72	60	1343	1438
YDL176W	mRNA	216	134	2944	3174
YDL177C	mRNA	50	35	964	1192
YDL178W	mRNA	470	463	13862	15694
YDL179W	mRNA	214	172	5340	5412
YDL180W	mRNA	206	171	3739	4285
YDL181W	mRNA	28	13	506	525
YDL182W	mRNA	422	370	6770	7267
YDL182W--YDL131W	mRNA	270	245	4319	4035
YDL183C	mRNA	91	52	1010	1105
YDL184C	mRNA	37	22	853	1081
YDL184C--YDL133C-A	mRNA	115	83	2873	3515
YDL185C-A	mRNA	132	110	1445	1618
YDL185W	mRNA	4273	3773	53373	65730
YDL186W	mRNA	54	33	212	205
YDL187C	mRNA	7	1	31	41
YDL187C--YDL186W	mRNA	20	15	187	194
YDL188C	mRNA	365	284	6109	6694
YDL188C--YDL134C	mRNA	74	68	1887	2202
YDL189W	mRNA	448	277	10333	9962
YDL190C	mRNA	850	727	14422	17034
YDL191W	mRNA	148	116	4704	5151
YDL191W--YDL136W	mRNA	1156	940	41239	47050
YDL192W	mRNA	522	329	18176	19442
YDL192W--YDL137W	mRNA	0	0	3	1
YDL193W	mRNA	152	124	3128	3654
YDL194W	mRNA	309	171	2950	3259
YDL195W	mRNA	6293	5246	41169	44298
YDL196W	mRNA	35	16	138	167
YDL197C	mRNA	354	299	6349	7192
YDL198C	mRNA	213	190	5065	6174
YDL199C	mRNA	131	80	1141	1149
YDL200C	mRNA	45	23	688	653
YDL201W	mRNA	482	409	12399	13236
YDL202W	mRNA	209	161	5003	5007
YDL203C	mRNA	406	330	8611	9329
YDL204W	mRNA	210	146	3172	3480
YDL205C	mRNA	552	463	12578	14809
YDL206W	mRNA	157	110	1915	2118
YDL207W	mRNA	472	338	11362	11823
YDL208W	mRNA	292	229	10132	12364
YDL209C	mRNA	187	127	2763	2994
YDL210W	mRNA	106	54	281	356
YDL211C	mRNA	154	105	2046	2403
YDL212W	mRNA	172	136	5828	6742
YDL213C	mRNA	473	420	13551	16230
YDL214C	mRNA	99	45	545	567
YDL215C	mRNA	347	239	6177	6552
YDL216C	mRNA	130	105	2115	2289
YDL217C	mRNA	194	172	4367	4591
YDL218W	mRNA	54	29	768	777
YDL219W	mRNA	101	66	2226	2543
YDL220C	mRNA	329	241	2535	2958
YDL221W	mRNA	16	18	195	258
YDL221W--YDL220C	mRNA	41	29	326	387
YDL222C	mRNA	77	76	535	553
YDL223C	mRNA	498	385	3587	3848
YDL224C	mRNA	917	720	14131	13759
YDL225W	mRNA	603	459	12668	13757
YDL226C	mRNA	621	526	15330	17428
YDL227C	mRNA	428	372	8217	8712
YDL228C	mRNA	2	6	89	104
YDL229W	mRNA	5556	4837	104945	118054
YDL229W--YDL228C	mRNA	4119	3573	88398	97360
YDL230W	mRNA	185	152	3730	4665
YDL231C	mRNA	729	517	12185	14259
YDL232W	mRNA	9	11	232	222
YDL233W	mRNA	158	116	1932	1906
YDL234C	mRNA	442	302	7404	8013
YDL235C	mRNA	218	182	5653	6657
YDL236W	mRNA	292	211	7551	8377
YDL237W	mRNA	265	203	5112	5118
YDL238C	mRNA	110	58	860	856
YDL239C	mRNA	204	106	1455	1633
YDL240C-A	mRNA	7	1	7	12
YDL240W	mRNA	621	411	7771	8672
YDL241W	mRNA	73	41	1165	1217
YDL242W	mRNA	12	16	198	251
YDL243C	mRNA	142	85	2153	2550
YDL244W	mRNA	108	33	145	170
YDL245C	mRNA	276	139	1498	1629
YDL246C	mRNA	126	47	766	757
YDL247W	mRNA	313	204	2404	2481
YDL247W-A	mRNA	0	5	39	28
YDL248W	mRNA	199	125	2793	2811
YDR001C	mRNA	832	618	15293	16547
YDR002W	mRNA	291	282	10502	12443
YDR003W	mRNA	139	66	3242	3355
YDR003W-A	mRNA	9	7	319	280
YDR004W	mRNA	229	135	4335	5095
YDR005C	mRNA	109	82	2503	2910
YDR006C	mRNA	1731	1536	26635	29724
YDR007W	mRNA	81	60	1971	2300
YDR007W--YDR008C	mRNA	60	58	1711	1979
YDR008C	mRNA	14	4	213	246
YDR009W	mRNA	88	57	448	508
YDR010C	mRNA	10	12	70	94
YDR011W	mRNA	7977	6822	95512	105624
YDR012W	mRNA	4373	3865	99250	102853
YDR013W	mRNA	44	22	872	937
YDR014W	mRNA	188	126	2771	3286
YDR014W-A	mRNA	13	6	32	26
YDR014W-A--YDR015C	mRNA	13	5	31	38
YDR016C	mRNA	20	11	311	364
YDR017C	mRNA	1114	911	17452	19742
YDR018C	mRNA	62	29	439	478
YDR019C	mRNA	185	170	5780	6495
YDR020C	mRNA	128	94	2757	3132
YDR021W	mRNA	234	162	5137	5574
YDR022C	mRNA	43	34	839	904
YDR023W	mRNA	1880	1562	52841	61555
YDR024W	mRNA	21	17	176	224
YDR025W	mRNA	2124	2102	58438	60701
YDR026C	mRNA	352	296	8623	9302
YDR027C	mRNA	538	454	9157	10395
YDR028C	mRNA	1401	1108	22831	25649
YDR029W	mRNA	124	100	1649	1844
YDR030C	mRNA	123	81	1198	1384
YDR031W	mRNA	20	18	386	382
YDR032C	mRNA	360	245	11035	10964
YDR033W	mRNA	1688	1407	49881	53901
YDR034C	mRNA	521	453	6574	7157
YDR034C-A	mRNA	450	357	3391	3598
YDR034W-B	mRNA	3	0	7	4
YDR035W	mRNA	508	466	15072	16537
YDR036C	mRNA	485	354	9369	9667
YDR037W	mRNA	5088	4248	138696	150479
YDR038C	mRNA	61	51	976	1056
YDR038C--YDR039C	mRNA	227	159	2540	2923
YDR038C--YDR039C--YDR040C	mRNA	3978	2990	52438	64945
YDR039C--YDR040C	mRNA	260	177	3458	4005
YDR040C	mRNA	71	39	937	1075
YDR041W	mRNA	117	75	3147	3407
YDR042C	mRNA	32	15	346	413
YDR043C	mRNA	50	30	918	1178
YDR044W	mRNA	393	295	9301	10603
YDR045C	mRNA	22	21	811	968
YDR046C	mRNA	1303	1003	32557	36496
YDR047W	mRNA	339	257	8477	9500
YDR048C	mRNA	14	1	152	117
YDR048C--YDR049W	mRNA	13	11	172	208
YDR049W	mRNA	453	350	8411	9228
YDR050C	mRNA	2325	1938	71433	75813
YDR051C	mRNA	252	173	7531	8611
YDR052C	mRNA	604	529	13144	14499
YDR052C--YDR053W	mRNA	94	70	1549	1758
YDR053W	mRNA	2	2	63	75
YDR054C	mRNA	477	383	12664	13739
YDR055W	mRNA	532	378	12875	12109
YDR056C	mRNA	266	212	7683	8287
YDR057W	mRNA	304	243	6890	7915
YDR058C	mRNA	84	72	2000	2327
YDR059C	mRNA	67	45	1425	1403
YDR060W	mRNA	2157	1863	40401	48901
YDR061W	mRNA	334	224	6552	7248
YDR062W	mRNA	848	723	21284	24505
YDR063W	mRNA	157	134	4386	4780
YDR064W	mRNA	1527	1189	47392	49318
YDR065W	mRNA	134	87	2026	2562
YDR066C	mRNA	54	39	717	754
YDR067C	mRNA	77	56	2277	2654
YDR068W	mRNA	340	303	9124	10264
YDR069C	mRNA	263	202	3394	3715
YDR070C	mRNA	23	3	227	245
YDR071C	mRNA	284	249	9607	10917
YDR072C	mRNA	754	600	17385	17696
YDR073W	mRNA	101	70	1875	1658
YDR074W	mRNA	1171	860	17530	17162
YDR075W	mRNA	464	409	8461	8756
YDR076W	mRNA	102	66	1020	1171
YDR077W	mRNA	16222	13167	196374	204075
YDR078C	mRNA	16	19	302	291
YDR079C-A	mRNA	15	15	416	512
YDR079W	mRNA	23	17	745	785
YDR080W	mRNA	417	309	6372	7143
YDR081C	mRNA	785	637	13610	15632
YDR082W	mRNA	69	68	1811	2008
YDR083W	mRNA	582	477	15632	17828
YDR084C	mRNA	217	159	4017	4440
YDR085C	mRNA	162	91	2459	2224
YDR086C	mRNA	233	184	7088	7320
YDR087C	mRNA	255	203	7365	8498
YDR088C	mRNA	261	219	6962	8004
YDR089W	mRNA	352	257	5591	6949
YDR090C	mRNA	96	76	2229	2449
YDR091C	mRNA	677	621	16682	19357
YDR092W	mRNA	174	204	5010	5150
YDR093W	mRNA	1756	1495	17708	20808
YDR093W--YDR094W	mRNA	123	131	2090	2468
YDR094W	mRNA	1	2	4	9
YDR094W--YDR095C	mRNA	0	0	1	0
YDR095C	mRNA	14	6	17	19
YDR096W	mRNA	561	444	4611	4667
YDR097C	mRNA	1017	846	13630	14860
YDR098C	mRNA	577	540	16232	17854
YDR099W	mRNA	1041	880	10184	9187
YDR100W	mRNA	94	54	2305	2658
YDR101C	mRNA	862	695	19912	22876
YDR102C	mRNA	15	8	103	104
YDR103W	mRNA	643	498	9735	10654
YDR104C	mRNA	329	201	3834	4083
YDR105C	mRNA	196	167	4881	5265
YDR106W	mRNA	49	31	350	431
YDR107C	mRNA	222	151	3155	3693
YDR108W	mRNA	170	146	3581	3954
YDR109C	mRNA	301	229	4429	5176
YDR110W	mRNA	206	168	4839	5475
YDR111C	mRNA	256	187	7437	8499
YDR111C--YDR112W	mRNA	31	35	948	1030
YDR112W	mRNA	10	10	418	425
YDR113C	mRNA	190	155	3199	3567
YDR114C	mRNA	10	7	334	322
YDR114C--YDR115W	mRNA	0	1	2	4
YDR115W	mRNA	30	18	745	808
YDR116C	mRNA	237	195	5752	5929
YDR117C	mRNA	317	241	6852	7198
YDR118W	mRNA	116	120	1661	1797
YDR118W--YDR118W-A	mRNA	0	1	12	19
YDR118W-A	mRNA	7	3	31	37
YDR119W	mRNA	945	776	14333	16857
YDR119W-A	mRNA	7	3	12	8
YDR120C	mRNA	761	638	19999	23796
YDR121W	mRNA	149	118	4413	5139
YDR122W	mRNA	849	681	9170	9121
YDR123C	mRNA	131	95	2900	3097
YDR124W	mRNA	78	60	1032	1157
YDR125C	mRNA	75	45	899	956
YDR126W	mRNA	139	71	2118	2330
YDR127W	mRNA	2213	1938	15704	18470
YDR128W	mRNA	625	520	9220	9506
YDR129C	mRNA	1561	1287	35090	40214
YDR130C	mRNA	87	64	1451	1683
YDR131C	mRNA	121	101	2333	2718
YDR132C	mRNA	117	104	2215	2539
YDR133C	mRNA	339	320	11214	13590
YDR135C	mRNA	2540	2084	32019	39881
YDR136C	mRNA	16	12	68	101
YDR137W	mRNA	331	254	7877	9060
YDR138W	mRNA	454	361	8276	9303
YDR139C	mRNA	40	40	1570	1874
YDR140W	mRNA	145	136	3251	3579
YDR141C	mRNA	1202	976	9176	11203
YDR142C	mRNA	155	124	3795	4217
YDR143C	mRNA	986	874	19879	22859
YDR144C	mRNA	981	816	19943	23360
YDR145W	mRNA	675	534	17067	19619
YDR146C	mRNA	725	602	9238	8295
YDR147W	mRNA	172	174	4593	5440
YDR148C	mRNA	469	340	10566	11765
YDR149C	mRNA	18	25	81	60
YDR149C--YDR150W	mRNA	93	82	167	222
YDR150W	mRNA	2729	2311	16396	19496
YDR151C	mRNA	270	227	6789	7303
YDR152W	mRNA	618	507	16019	16638
YDR153C	mRNA	587	470	11480	12369
YDR154C	mRNA	77	69	2645	2858
YDR154C--YDR155C	mRNA	499	446	19344	20560
YDR155C	mRNA	1003	860	36410	40361
YDR156W	mRNA	78	150	1653	2221
YDR157W	mRNA	29	31	386	329
YDR158W	mRNA	587	428	16498	18635
YDR159W	mRNA	770	638	11308	12818
YDR160W	mRNA	277	213	5155	5921
YDR161W	mRNA	371	380	11433	12906
YDR162C	mRNA	154	105	3715	4214
YDR163W	mRNA	175	121	4085	4477
YDR164C	mRNA	426	272	7502	8241
YDR165W	mRNA	360	267	10036	10900
YDR166C	mRNA	591	419	7205	7880
YDR167W	mRNA	100	99	3072	3353
YDR168W	mRNA	1079	892	28303	32822
YDR169C	mRNA	780	628	9747	9751
YDR169C-A	mRNA	2	13	61	51
YDR170C	mRNA	5296	4522	29219	35316
YDR171W	mRNA	281	147	4751	4376
YDR172W	mRNA	2034	1741	46383	52767
YDR173C	mRNA	101	90	2058	2296
YDR174W	mRNA	775	590	20113	24088
YDR175C	mRNA	292	228	6855	7076
YDR176W	mRNA	553	418	10297	12069
YDR177W	mRNA	181	158	5799	6938
YDR178W	mRNA	123	92	2931	2851
YDR179C	mRNA	17	12	369	403
YDR179W-A	mRNA	90	55	1776	2397
YDR180W	mRNA	426	308	3987	4954
YDR181C	mRNA	167	141	4224	5122
YDR182W	mRNA	551	431	11101	11903
YDR182W-A	mRNA	13	7	139	184
YDR183C-A	mRNA	34	29	1087	1061
YDR183W	mRNA	55	55	1043	1015
YDR184C	mRNA	354	260	9298	10289
YDR185C	mRNA	38	23	852	948
YDR186C	mRNA	1414	1217	24313	28378
YDR187C	mRNA	29	19	474	587
YDR187C--YDR188W	mRNA	214	239	4705	5704
YDR188W	mRNA	1013	906	24374	27536
YDR189W	mRNA	672	600	16379	17349
YDR190C	mRNA	535	466	15750	17663
YDR191W	mRNA	116	85	1819	1884
YDR192C	mRNA	227	119	3239	3358
YDR192C--YDR193W	mRNA	54	27	806	757
YDR193W	mRNA	3	4	47	44
YDR194C	mRNA	1165	903	26953	30131
YDR194W-A	mRNA	0	8	3	1
YDR195W	mRNA	379	282	8350	9429
YDR196C	mRNA	117	72	2514	2597
YDR197W	mRNA	296	218	5972	6591
YDR198C	mRNA	216	187	4686	5084
YDR199W	mRNA	6	1	79	104
YDR199W--YDR200C	mRNA	13	9	378	367
YDR200C	mRNA	261	209	5661	5942
YDR201W	mRNA	78	34	1538	1657
YDR202C	mRNA	63	57	1465	1554
YDR202C--YDR203W	mRNA	41	37	1060	1146
YDR203W	mRNA	11	3	82	101
YDR204W	mRNA	137	122	3384	3863
YDR205W	mRNA	347	232	3968	4228
YDR206W	mRNA	488	355	11809	14163
YDR207C	mRNA	665	505	8922	10148
YDR208W	mRNA	779	517	9987	10504
YDR209C	mRNA	37	25	881	1003
YDR209C--YDR210W	mRNA	46	33	1426	1527
YDR211W	mRNA	852	628	19428	22549
YDR212W	mRNA	665	563	14889	16308
YDR213W	mRNA	431	331	5965	6958
YDR214W	mRNA	745	619	19564	21511
YDR215C	mRNA	9	7	48	59
YDR216W	mRNA	625	450	4018	4010
YDR217C	mRNA	715	540	9377	11093
YDR218C	mRNA	31	15	77	68
YDR219C	mRNA	209	162	4354	4938
YDR220C	mRNA	10	5	25	50
YDR221W	mRNA	441	351	8034	9169
YDR222W	mRNA	150	88	1341	1404
YDR223W	mRNA	108	81	1358	1558
YDR224C	mRNA	522	460	14271	14997
YDR225W	mRNA	379	329	12868	15489
YDR226W	mRNA	669	542	24073	28072
YDR227W	mRNA	674	503	6876	6949
YDR228C	mRNA	545	470	9713	10957
YDR229W	mRNA	406	326	10136	11310
YDR230W	mRNA	5	9	183	200
YDR230W--YDR231C	mRNA	38	18	1472	1525
YDR231C	mRNA	33	28	707	847
YDR232W	mRNA	791	707	10688	10907
YDR233C	mRNA	2414	1970	42565	45950
YDR234W	mRNA	796	754	17305	21031
YDR235W	mRNA	227	159	5293	5518
YDR236C	mRNA	125	96	3467	3835
YDR237W	mRNA	208	160	5042	5685
YDR238C	mRNA	1911	1681	33884	40177
YDR239C	mRNA	382	245	4482	4781
YDR240C	mRNA	285	224	6064	7062
YDR241W	mRNA	9	5	230	283
YDR242W	mRNA	158	102	2083	2311
YDR243C	mRNA	138	100	1799	2064
YDR244W	mRNA	313	275	7434	8290
YDR245W	mRNA	343	315	9976	11452
YDR246W	mRNA	220	160	4636	4778
YDR246W-A	mRNA	7	6	105	102
YDR247W	mRNA	167	122	1431	1429
YDR248C	mRNA	64	47	1521	1734
YDR249C	mRNA	63	38	696	876
YDR250C	mRNA	13	5	40	43
YDR251W	mRNA	907	727	18066	19519
YDR252W	mRNA	37	19	669	683
YDR253C	mRNA	53	32	872	867
YDR254W	mRNA	112	67	2275	2458
YDR255C	mRNA	155	101	1841	1851
YDR256C	mRNA	157	121	3091	3457
YDR257C	mRNA	147	145	3724	4196
YDR258C	mRNA	439	337	8221	8420
YDR259C	mRNA	100	57	1051	1067
YDR260C	mRNA	197	182	3746	4251
YDR261C	mRNA	407	348	9245	10808
YDR262W	mRNA	361	300	9594	10030
YDR263C	mRNA	125	89	1505	1864
YDR264C	mRNA	748	592	17531	20053
YDR265W	mRNA	143	102	3223	4015
YDR266C	mRNA	573	482	11188	12499
YDR267C	mRNA	259	158	5579	5637
YDR268W	mRNA	119	75	2130	2341
YDR269C	mRNA	2	1	22	18
YDR269C--YDR270W	mRNA	72	71	877	787
YDR270W	mRNA	474	404	6117	6050
YDR270W--YDR271C	mRNA	161	127	2317	2407
YDR271C	mRNA	41	50	523	590
YDR272W	mRNA	287	165	7707	8587
YDR273W	mRNA	128	94	1975	2141
YDR274C	mRNA	96	135	1680	2336
YDR275W	mRNA	119	61	1781	2044
YDR276C	mRNA	379	244	6276	7381
YDR277C	mRNA	524	372	9018	9449
YDR278C	mRNA	5	0	8	1
YDR278C--tE(CUC)D	mRNA--tRNA	2	1	3	4
YDR279W	mRNA	121	103	2437	2791
YDR280W	mRNA	596	452	13472	15662
YDR281C	mRNA	24	16	443	527
YDR282C	mRNA	121	88	1689	1739
YDR283C	mRNA	846	653	7432	8226
YDR284C	mRNA	136	109	3080	3291
YDR285W	mRNA	129	61	1182	1365
YDR286C	mRNA	19	6	122	172
YDR287W	mRNA	156	92	2871	2978
YDR288W	mRNA	176	153	4494	5409
YDR289C	mRNA	261	186	4864	5696
YDR289C--YDR290W	mRNA	9	14	284	364
YDR290W	mRNA	3	6	44	74
YDR291W	mRNA	516	449	7203	8527
YDR292C	mRNA	1021	848	22595	25282
YDR293C	mRNA	2532	1949	23408	26921
YDR294C	mRNA	417	316	9267	10104
YDR295C	mRNA	229	200	4339	4916
YDR296W	mRNA	230	179	5493	6150
YDR297W	mRNA	686	533	17439	19314
YDR298C	mRNA	266	183	7337	7422
YDR299W	mRNA	779	585	15541	16683
YDR300C	mRNA	382	356	10275	11992
YDR301W	mRNA	929	802	9698	9914
YDR302W	mRNA	129	80	3144	3681
YDR303C	mRNA	512	380	7549	8885
YDR304C	mRNA	982	848	32048	36754
YDR305C	mRNA	112	84	2902	3277
YDR306C	mRNA	128	115	2581	3090
YDR307W	mRNA	414	318	6561	7350
YDR308C	mRNA	81	68	2138	2341
YDR309C	mRNA	1052	785	21762	22648
YDR310C	mRNA	1048	927	12565	13831
YDR311W	mRNA	286	231	5348	6074
YDR312W	mRNA	266	251	7823	8449
YDR313C	mRNA	83	58	1736	1725
YDR314C	mRNA	158	119	990	1199
YDR315C	mRNA	39	27	708	773
YDR316W	mRNA	318	275	6811	7317
YDR317W	mRNA	66	53	1127	1228
YDR318W	mRNA	94	65	1819	1885
YDR319C	mRNA	78	52	1232	1206
YDR320C	mRNA	543	409	3463	2794
YDR320C-A	mRNA	31	49	1381	1368
YDR320W-B	mRNA	2	0	33	14
YDR321W	mRNA	434	322	13291	17035
YDR322C-A	mRNA	90	74	2590	2772
YDR322W	mRNA	143	99	3077	3282
YDR323C	mRNA	84	68	1227	1387
YDR324C	mRNA	1138	952	26276	31061
YDR325W	mRNA	451	317	6390	7673
YDR326C	mRNA	1429	1207	15017	17596
YDR327W	mRNA	22	27	852	919
YDR327W--YDR328C	mRNA	51	46	1743	1880
YDR328C	mRNA	337	272	11777	13914
YDR329C	mRNA	281	211	6039	6713
YDR330W	mRNA	356	257	7670	8205
YDR331W	mRNA	159	166	4287	4562
YDR332W	mRNA	202	151	2622	2488
YDR333C	mRNA	536	411	12632	14469
YDR334W	mRNA	1511	1271	16665	20042
YDR335W	mRNA	1309	980	16496	17551
YDR336W	mRNA	49	41	985	1028
YDR337W	mRNA	171	135	4262	4568
YDR338C	mRNA	158	122	2054	2155
YDR339C	mRNA	192	203	6509	7700
YDR340W	mRNA	360	277	2808	3181
YDR341C	mRNA	2163	1822	51453	58852
YDR342C	mRNA	31	23	650	761
YDR342C--YDR343C	mRNA	539	393	8390	9969
YDR342C--YDR343C--YDR345C	mRNA	1518	1371	37479	45429
YDR343C	mRNA	3	6	59	80
YDR344C	mRNA	88	100	611	688
YDR345C	mRNA	7232	6109	190281	206040
YDR346C	mRNA	1209	1076	31556	35777
YDR347W	mRNA	298	226	6871	6994
YDR348C	mRNA	557	520	15598	18675
YDR349C	mRNA	673	628	14717	16603
YDR350C	mRNA	168	143	3443	3819
YDR351W	mRNA	586	515	8562	9442
YDR352W	mRNA	127	104	2433	2787
YDR353W	mRNA	2229	1944	67949	80711
YDR354W	mRNA	177	163	6434	7319
YDR354W--YDR354C-A	mRNA	17	9	498	520
YDR355C	mRNA	3	2	63	65
YDR355C--YDR356W	mRNA	29	33	337	397
YDR356W	mRNA	272	202	4192	5009
YDR357C	mRNA	103	98	3895	4637
YDR358W	mRNA	179	138	3077	3108
YDR359C	mRNA	1115	910	11189	12038
YDR359C--YDR360W	mRNA	44	26	320	321
YDR360W	mRNA	24	8	187	178
YDR361C	mRNA	242	245	8360	9324
YDR362C	mRNA	226	129	3409	3796
YDR363W	mRNA	217	138	3241	3685
YDR363W-A	mRNA	837	635	23757	28123
YDR364C	mRNA	371	359	8362	9746
YDR365C	mRNA	1659	1419	43219	51893
YDR366C	mRNA	4153	3403	7473	9412
YDR367W	mRNA	87	69	1793	1802
YDR368W	mRNA	355	283	10104	11552
YDR369C	mRNA	182	145	2088	2206
YDR370C	mRNA	213	169	5095	5643
YDR371W	mRNA	239	181	5374	5895
YDR371W--YDR371C-A	mRNA	6	5	216	259
YDR372C	mRNA	405	333	11537	13252
YDR373W	mRNA	108	101	3164	3762
YDR374C	mRNA	11	11	9	8
YDR374W-A	mRNA	15	8	498	515
YDR375C	mRNA	299	238	7352	8257
YDR376W	mRNA	213	173	5041	5947
YDR377W	mRNA	126	112	4005	4653
YDR378C	mRNA	68	56	2127	2330
YDR379C-A	mRNA	15	9	255	247
YDR379W	mRNA	615	446	11045	12218
YDR380W	mRNA	167	123	2896	3029
YDR381C-A	mRNA	87	59	1782	2117
YDR381W	mRNA	988	919	32769	38445
YDR382W	mRNA	494	503	18765	24018
YDR383C	mRNA	55	28	947	1059
YDR384C	mRNA	294	228	5103	5010
YDR385W	mRNA	19053	17202	279441	328308
YDR386W	mRNA	131	92	2126	2465
YDR387C	mRNA	152	109	2066	2249
YDR388W	mRNA	1023	989	26250	28043
YDR389W	mRNA	761	637	9024	10160
YDR390C	mRNA	517	439	12805	14475
YDR391C	mRNA	91	54	1808	1769
YDR392W	mRNA	161	145	3507	3682
YDR393W	mRNA	286	237	5241	6271
YDR394W	mRNA	635	495	18853	20197
YDR395W	mRNA	1470	1230	21189	24932
YDR396W	mRNA	20	15	598	540
YDR396W--YDR397C	mRNA	106	82	2736	3099
YDR397C	mRNA	13	12	458	570
YDR398W	mRNA	1179	1058	32109	37346
YDR399W	mRNA	436	391	14016	18655
YDR400W	mRNA	188	171	3723	3808
YDR401W	mRNA	0	0	1	1
YDR401W--YDR402C	mRNA	19	16	116	145
YDR402C	mRNA	35	36	295	401
YDR403W	mRNA	98	68	1254	1340
YDR404C	mRNA	111	98	2853	3154
YDR405W	mRNA	352	302	8416	9187
YDR406W	mRNA	1334	1018	12033	13118
YDR406W-A	mRNA	1	3	12	18
YDR407C	mRNA	1024	723	14580	17096
YDR408C	mRNA	149	154	5028	5815
YDR409W	mRNA	374	259	4174	4372
YDR410C	mRNA	141	100	3839	4495
YDR411C	mRNA	347	272	8624	9994
YDR412W	mRNA	145	102	3107	3355
YDR412W--YDR413C	mRNA	393	310	9295	10651
YDR413C	mRNA	8	5	178	226
YDR414C	mRNA	152	125	3525	3973
YDR415C	mRNA	221	212	5633	6397
YDR416W	mRNA	298	213	4313	4960
YDR417C	mRNA	118	141	4297	5086
YDR417C--YDR418W	mRNA	750	757	25068	28543
YDR418W	mRNA	607	517	19715	21360
YDR419W	mRNA	245	191	4597	5228
YDR420W	mRNA	3540	3509	15498	17689
YDR421W	mRNA	269	159	3007	3393
YDR422C	mRNA	534	465	6995	7826
YDR423C	mRNA	406	346	5680	5578
YDR424C	mRNA	109	111	4168	5233
YDR425W	mRNA	323	248	3003	2891
YDR425W--YDR426C	mRNA	40	18	537	545
YDR426C	mRNA	1	0	16	19
YDR427W	mRNA	687	569	20852	26449
YDR428C	mRNA	50	33	884	991
YDR429C	mRNA	697	653	23605	27767
YDR430C	mRNA	686	575	10321	11442
YDR430C--YDR431W	mRNA	5	2	32	40
YDR431W	mRNA	5	10	84	94
YDR432W	mRNA	3915	3275	62764	72394
YDR432W--YDR433W	mRNA	296	309	5274	5969
YDR433W	mRNA	10	9	211	208
YDR434W	mRNA	369	291	9029	10572
YDR435C	mRNA	60	35	1073	1094
YDR436W	mRNA	303	272	4591	4696
YDR437W	mRNA	71	79	1320	1624
YDR438W	mRNA	77	60	1020	1204
YDR439W	mRNA	116	86	1936	1994
YDR440W	mRNA	288	239	6674	7288
YDR441C	mRNA	201	174	3459	3708
YDR442W	mRNA	7	6	80	97
YDR442W--YDR443C	mRNA	76	60	1213	1191
YDR443C	mRNA	715	642	6186	6919
YDR444W	mRNA	325	254	6168	7341
YDR444W--YDR445C	mRNA	94	72	2139	2660
YDR445C	mRNA	9	5	10	10
YDR446W	mRNA	15	23	275	195
YDR447C	mRNA	381	336	13853	16737
YDR448W	mRNA	339	293	7479	8909
YDR449C	mRNA	397	335	11017	12031
YDR450W	mRNA	944	891	33989	39606
YDR451C	mRNA	286	227	5200	6142
YDR452W	mRNA	1065	829	28866	30928
YDR453C	mRNA	79	51	1717	1886
YDR454C	mRNA	385	323	12110	14543
YDR455C	mRNA	3	1	28	57
YDR455C--YDR456W	mRNA	29	23	373	407
YDR456W	mRNA	425	342	7551	8219
YDR457W	mRNA	4618	4120	17936	22164
YDR458C	mRNA	271	252	6493	6788
YDR459C	mRNA	94	53	2005	2237
YDR460W	mRNA	185	132	4675	4854
[truncated: 5,471 more rows]

## Sheet: Table S4
Table S4: Raw data of UHLPC-MS/MS analysis WT and KO cell types. Measurements were done in triplicates (technical replicate) for each sample and each measurement represents picomolar concentration (pmol/L) of each nucleoside.
Nucleoside	Abbreviation	Found in S. cerevisiae	PTM Class	WT total RNA replicate 1 (pM)			WT total RNA replicate 2 (pM)			Δtrm1 total RNA replicate 1 (pM)			Δtrm1 total RNA replicate 2 (pM)			Δtrm2 total RNA replicate 1 (pM)			Δtrm2 total RNA replicate 2 (pM)			Δtrm10 total RNA replicate 1 (pM)			Δtrm10 total RNA replicate 2 (pM)			Δtrm11 total RNA replicate 1 (pM)			Δtrm11 total RNA replicate 2 (pM)			WT mRNA replicate 1 (pM)			WT mRNA replicate 2 (pM)			Δtrm1 mRNA replicate 1 (pM)			Δtrm1 mRNA replicate 2 (pM)			Δtrm2 mRNA replicate 1 (pM)			Δtrm2 mRNA replicate 2 (pM)
Adenosine	A			7.33618e+06	1.20914e+07	9.25903e+06	1.07726e+07	1.34115e+07	1.17251e+07	9.07669e+06	1.11382e+07	1.34178e+07	1.13795e+07	1.38946e+07	1.31881e+07	1.10702e+07	1.06618e+07	1.07881e+07	1.17528e+07	1.19223e+07	1.15383e+07	9.7234e+06	1.26841e+07	1.28814e+07	1.03476e+07	1.28712e+07	1.10935e+07	1.17703e+07	1.30343e+07	1.14804e+07	1.1756e+07	1.186e+07	1.21817e+07	9.07098e+06	1.05024e+07	9.78125e+06	8.90978e+06	9.42236e+06	1.0092e+07	8.828e+06	9.56957e+06	9.50691e+06	8.57873e+06	9.04025e+06	1.08956e+07	1.01629e+07	1.01277e+07	1.00156e+07	1.09201e+07
Cytidine	C			4.33199e+06	6.93538e+06	5.48177e+06	6.08279e+06	7.72646e+06	6.65975e+06	5.25314e+06	6.39945e+06	7.5686e+06	7.10377e+06	8.13565e+06	7.52545e+06	7.2245e+06	6.91841e+06	6.93841e+06	7.5366e+06	7.47164e+06	7.45426e+06	5.59292e+06	7.34214e+06	7.21085e+06	6.09115e+06	7.45289e+06	6.49767e+06	6.75343e+06	7.57277e+06	6.51378e+06	6.80152e+06	6.94776e+06	6.89614e+06	3.60017e+06	4.09657e+06	3.83673e+06	3.44166e+06	3.64973e+06	3.94171e+06	3.44234e+06	3.73635e+06	3.72049e+06	3.36965e+06	3.55321e+06	4.34542e+06	4.67763e+06	4.72548e+06	4.6055e+06	5.14189e+06
Guanosine	G			7.61343e+06	1.2088e+07	9.71677e+06	1.09657e+07	1.31388e+07	1.1882e+07	9.67752e+06	1.14327e+07	1.33201e+07	1.14606e+07	1.40024e+07	1.33084e+07	1.18647e+07	1.15222e+07	1.1515e+07	1.25724e+07	1.26862e+07	1.24063e+07	1.01297e+07	1.27323e+07	1.29419e+07	1.05953e+07	1.29862e+07	1.09967e+07	1.20541e+07	1.31619e+07	1.16487e+07	1.19044e+07	1.20778e+07	1.23792e+07	5.88766e+06	6.71144e+06	6.20569e+06	5.78728e+06	6.08289e+06	6.43327e+06	5.62627e+06	6.04113e+06	6.09929e+06	5.72201e+06	5.91249e+06	7.04199e+06	6.4233e+06	6.54047e+06	6.34075e+06	7.10708e+06
Uridine	U			8.194e+06	1.22724e+07	1.00704e+07	1.12346e+07	1.33484e+07	1.21158e+07	9.93313e+06	1.14775e+07	1.2954e+07	1.26629e+07	1.39284e+07	1.31071e+07	1.12986e+07	1.10209e+07	1.0836e+07	1.20953e+07	1.22053e+07	1.12481e+07	1.02149e+07	1.27012e+07	1.26535e+07	1.12016e+07	1.31892e+07	1.28039e+07	1.18298e+07	1.32732e+07	1.16423e+07	1.19727e+07	1.1917e+07	1.22391e+07	8.65943e+06	9.62301e+06	9.1e+06	8.28302e+06	8.89358e+06	9.50188e+06	8.23581e+06	8.90683e+06	8.86749e+06	7.81536e+06	8.31751e+06	9.7501e+06	9.0622e+06	9.11597e+06	8.85807e+06	1.0058e+07
Dihydrouridine	D	Yes	r, t	146347	237966	195129	208916	257195	226317	189559	219903	265351	265974	283572	264643	237383	223964	224552	226510	224468	228321	202155	269529	270294	227052	272249	254902	234884	271612	235011	246920	244317	256374	N.D.	N.D.	N.D.	N.D.	N.D.	N.D.	N.D.	N.D.	N.D.	N.D.	N.D.	N.D.	N.D.	N.D.	N.D.	N.D.
5-hydroxymethylcytidine	hm5C	No	m, r	N.D.	N.D.	N.D.	N.D.	N.D.	N.D.	N.D.	N.D.	N.D.	N.D.	N.D.	N.D.	N.D.	N.D.	N.D.	N.D.	N.D.	N.D.	N.D.	N.D.	N.D.	N.D.	N.D.	N.D.	N.D.	N.D.	N.D.	N.D.	N.D.	N.D.	N.D.	N.D.	N.D.	N.D.	N.D.	N.D.	N.D.	N.D.	N.D.	N.D.	N.D.	N.D.	N.D.	N.D.	N.D.	N.D.
Pseudouridine	Ψ	Yes	m, r, sn, sno, t	363020	586463	494205	537542	660344	598616	465620	557757	670901	651853	717282	660016	516829	507456	511388	556389	554260	551338	498522	639720	644713	536805	662287	625358	573573	682890	598596	605982	605737	618074	1722.56	2378.52	2399.01	2132.54	1620.06	2603.99	1435.55	1948.05	1927.55	1359.88	1605.81	1844.88	2326.82	1789.24	2680.35	2456.84
3-methylcytidine	m3C	Yes	m, t	1784.29	2903.74	2386.57	2590.67	3368.32	2804.8	2190.56	2580.02	3224.32	3048.4	3571.89	3308.95	4604.69	4505.83	4675.98	4874.75	4846.93	5028.24	2626.49	3550.45	3504.65	2942.56	3777.64	3363.45	2967.8	3356.64	2953.24	2983.33	3200.99	3135.85	N.D.	N.D.	N.D.	N.D.	N.D.	N.D.	N.D.	N.D.	N.D.	N.D.	N.D.	N.D.	20.0302	21.9939	17.4247	26.3613
1-methyladenosine	m1A	Yes	m, r, t	15562.7	27450.2	21010.7	24382.4	29565.8	25944.8	20902.2	25035.2	30064.4	29376.3	31832.7	30748.4	39298.4	37543.3	37368.2	41135.5	40884.8	41559.3	22206.1	28682	29449.2	24391.1	30810.4	27892.7	26602.8	28958.1	25165.2	26941.7	26587.5	27552.1	14.6174	10.8962	8.4297	18.9839	11.5148	12.754	12.754	29.0377	12.1341	12.754	16.4858	13.3746	14.1406	13.2323	13.9307	16.3253
5-hydroxyuridine	ho5U	No	t	N.D.	N.D.	N.D.	N.D.	N.D.	N.D.	N.D.	N.D.	N.D.	N.D.	N.D.	N.D.	N.D.	N.D.	N.D.	N.D.	N.D.	N.D.	N.D.	N.D.	N.D.	N.D.	N.D.	N.D.	N.D.	N.D.	N.D.	N.D.	N.D.	N.D.	N.D.	N.D.	N.D.	N.D.	N.D.	N.D.	N.D.	N.D.	N.D.	N.D.	N.D.	N.D.	N.D.	N.D.	N.D.	N.D.
5-methylcytidine	m5C	Yes	m, r, t	32544.3	56428.6	41822.3	51662	62754.2	52982.9	42638.1	52062.3	61589.4	57618.6	65780.5	60893.6	45742	45013.1	44639.9	55258.2	54673.9	52604.4	48561.9	62220	60874.1	52272.3	64612	55207.1	55637.3	61730.1	52518.7	57772.4	57932.7	55848.5	186.884	223.003	153.411	193.575	185.546	213.642	156.09	154.751	177.515	151.343	181.638	236.823	209.19	207.436	219.133	239.545
1-methylpseudouridine	m1Ψ	Yes	r, t	241.119	419.054	282.032	487.863	570.643	446.557	405.314	364.14	391.581	681.322	501.645	639.78	449.541	417.569	436.709	543.444	586.974	534.764	391.581	529.226	474.088	391.581	529.226	391.581	667.47	487.863	446.557	529.226	529.226	487.863	N.D.	N.D.	N.D.	N.D.	N.D.	N.D.	N.D.	N.D.	N.D.	N.D.	N.D.	N.D.	N.D.	N.D.	N.D.	N.D.
7-methylguanosine	m7G	Yes	m, r, t	11287.6	17588.7	12500	16022.8	19023.5	16435.3	16623.3	15975.3	18638.2	21173.7	19921.4	19911.8	21419.1	19863.5	19568.2	21676.6	22058.1	22453.4	14746	18143.2	19347.4	16102.9	19881.4	18658.2	18634.7	19047	15941	18232.3	17300.6	17447.7	904.464	1639.08	1408.15	1453.9	1118.28	961.82	1350.08	1419.34	1213.98	1349.06	1825.02	1811.99	1024.89	1060.2	1043.74	1171.82
2′-O-methylcytidine	Cm	Yes	m, r, sn, t	56176.1	96312.4	73477.5	87547.3	107747	92517.6	73569.8	89417.6	106186	101036	112354	103673	88367.7	86859.4	81532.6	90410.1	95606.9	90338.1	76451.8	99870.9	98021.9	85011.8	103913	94997.3	93967.2	105536	89928.5	94490.8	94125.3	94070.8	81.4292	88.8896	102.796	140.515	157.871	180.741	110.309	113.534	81.4292	102.834	99.8757	129.199	112.641	106.66	114.997	135.267
Inosine	I	Yes	m, t	7449.14	13035.2	24518.3	11687.6	13763.2	11910.4	10438.8	12183.8	14237.9	13925.6	14293.7	13956.1	11609.4	12232.5	14889.9	13842.9	13344.3	12343.4	10817.7	13588.1	13423.2	11667.4	14187.1	11912.9	13108.7	13418.1	11831.9	13973.8	13298.9	13111.2	N.D.	N.D.	N.D.	N.D.	N.D.	N.D.	N.D.	N.D.	N.D.	N.D.	N.D.	N.D.	489.659	1330.15	729.59	925.191
5-methyluridine	m5U	Yes	m, r, t	35953.8	59445.1	46742.3	51772.6	63456.4	55911.3	46168.9	55455.6	66220.7	65546.6	68552.5	64427.1	3823.94	3499.64	3490.64	3952.18	3875.49	3805.98	54379.3	68089.5	69021.3	57711.9	67860.8	63376.5	59827.2	65643.7	56805.7	61738.3	62366.1	62371.8	89.9997	95.0914	100.188	74.7562	69.6866	79.8318	84.9131	100.188	44.4467	63.5837	63.2519	68.2331	29.9535	49.816	24.1359	29.1074
5-formylcytidine	f5C	Yes	m, t	N.D.	N.D.	N.D.	N.D.	N.D.	N.D.	N.D.	N.D.	N.D.	N.D.	N.D.	N.D.	N.D.	N.D.	N.D.	N.D.	N.D.	N.D.	N.D.	N.D.	N.D.	N.D.	N.D.	N.D.	N.D.	N.D.	N.D.	N.D.	N.D.	N.D.	N.D.	N.D.	N.D.	N.D.	N.D.	N.D.	N.D.	N.D.	N.D.	N.D.	N.D.	N.D.	N.D.	N.D.	N.D.	N.D.
2′-O-methyluridine	Um	Yes	m, r, sn, sno, t	48530.3	82478.5	60403.5	72808	90280.2	78451.2	62018.5	75303	87307.2	86429	90190.1	82838.5	65182.7	62098.8	65046.3	74434.1	75032.1	69314	66293.8	81893.4	82219.7	72987.8	84931.9	82388.5	77821.5	86654.2	74741	77371.7	78530	81162.1	134.874	155.871	208.49	219.033	61.7198	229.581	124.389	92.9957	40.9624	104.503	62.3484	108.73	171.429	175.494	122.421	188.572
2-methyladenosine	m2A	No	r, t	N.D.	N.D.	N.D.	N.D.	N.D.	N.D.	N.D.	N.D.	N.D.	N.D.	N.D.	N.D.	N.D.	N.D.	N.D.	N.D.	N.D.	N.D.	N.D.	N.D.	N.D.	N.D.	N.D.	N.D.	N.D.	N.D.	N.D.	N.D.	N.D.	N.D.	N.D.	N.D.	N.D.	N.D.	N.D.	N.D.	N.D.	N.D.	N.D.	N.D.	N.D.	N.D.	N.D.	N.D.	N.D.	N.D.
1-methylguanosine	m1G	Yes	m, r, t	28748.4	48841.4	34247.4	43822.2	51716.2	42432.1	41240.1	48678.8	55628.3	57041.4	60410.3	55512.3	45783.6	44616.2	45057.1	51528.8	50706.9	50347.5	15737	19177.5	19001.5	16413.8	19590.4	16458.1	50381.6	52384.6	44039.8	52802.8	50077.8	48885	33.8509	41.0688	32.411	33.8509	57.0369	36.7346	35.2921	41.0688	38.1782	40.4058	26.8998	41.5852	56.5435	47.6368	38.4768	50.8219
2′-O-methylguanosine	Gm	Yes	m, r, sn, t	84723.2	142544	105592	132967	158291	134030	112367	130919	150390	149330	158694	146985	118945	115556	115670	125128	127647	122948	121093	148326	146808	130151	153506	133705	142288	150280	129161	144673	139867	138222	231.751	293.212	237.521	333.456	335.371	385.111	249.055	235.597	235.597	259.188	290.312	327.455	301.095	332.823	331.291	404.393
1-methylinosine	m1I	Yes	t	2297.15	3553.45	2576.26	3117.88	3689.12	3238.99	2702.95	3247.64	3992.33	3715.1	3928.79	3735.31	2937	2933.03	2511.96	3256.27	2950.94	3039.16	3048.7	3885.47	3862.36	3423.6	3717.99	3492.85	3299.56	3565	3328.4	3582.32	3440.91	3660.25	N.D.	N.D.	N.D.	N.D.	N.D.	N.D.	N.D.	N.D.	N.D.	N.D.	N.D.	N.D.	N.D.	N.D.	N.D.	N.D.
N2-methylguanosine	m2G	Yes	r, sn, t	25321.7	43706.9	31785.5	39241.5	46122.3	39853.6	32427.8	39054.1	46754.4	43604.9	47781.1	45065.7	44660.8	40460.1	41168.6	47011.7	46042.5	51797.3	36199	46728.4	46822.9	39009.6	48001.6	38831.6	546.537	620.207	550.316	608.876	525.75	546.537	51.7638	47.9453	49.8547	51.7638	46.0356	61.3047	32.6571	40.3044	53.6725	43.9694	43.1126	48.1666	74.0351	95.7491	74.9167	84.6068
N4-acetylcytidine	ac4C	Yes	m ,r, t	9475.72	15812.1	11877.1	14240.4	17021	14556.5	13047.4	14006.5	16633.5	18181.1	17856.9	17465.3	18899.9	19325.2	18021.3	20984.5	19856.3	20280.4	12842.9	15951.2	17797.9	14059.2	16709.4	15618.3	15982.8	17522.1	14651.3	15637.3	15628.9	16048.1	N.D.	N.D.	N.D.	N.D.	N.D.	N.D.	N.D.	N.D.	N.D.	N.D.	N.D.	N.D.	N.D.	N.D.	N.D.	N.D.
2′-O-methyladenosine	Am	Yes	m, r, sn, sno, t	92172.2	147600	112775	135067	161916	141303	114437	135747	157384	150187	165324	154447	135347	133333	132820	145978	143510	142917	118020	148973	150660	131655	154368	141872	143515	157970	138146	146135	142351	144579	102.669	122.721	111.429	164.359	177.039	194.834	97.6717	107.672	104.544	108.924	100.794	125.863	137.987	164.022	164.518	162.453
N6-methyladenosine	m6A	Yes	m, r, sn, t	9093.58	14850.6	11245.1	13869.1	16294.3	14019.2	10633.5	14760	15876.6	13789.6	17179.8	15087	11287.5	11600	11351.8	12676.7	12351.1	12089.8	12623.4	15874.6	13835.8	13444.2	15773.5	14097.3	14098.7	15305.9	13773.3	15249.3	14689.2	13963.5	21.4549	26.5817	22.9878	36.4391	38.0073	39.0544	22.9878	28.1287	20.945	26.0889	26.7524	28.8579	32.0612	31.5123	34.7168	39.7011
N2,N2-dimethylguanosine	m22G	Yes	r, t	22966	37962.3	28170.7	34146.3	41014.8	34644.9	35.8681	43.9619	71.7061	68.2385	70.5502	60.147	39610.2	38782	38713.6	43577	44251.4	44732.8	32752.9	41300.3	40279	35096.3	41772.4	36337.6	38029.1	40147.8	35477.4	39634.2	39072.3	38710.8	24.3035	31.2426	28.9297	31.2426	43.9619	35.8681	5.79159	11.5783	9.2639	10.4211	10.4211	5.79159	41.4467	46.563	46.563	48.3686
N6,2′-O-dimethyladenosine	m6Am	No	m, sn	N.D.	N.D.	N.D.	N.D.	N.D.	N.D.	N.D.	N.D.	N.D.	N.D.	N.D.	N.D.	N.D.	N.D.	N.D.	N.D.	N.D.	N.D.	N.D.	N.D.	N.D.	N.D.	N.D.	N.D.	N.D.	N.D.	N.D.	N.D.	N.D.	N.D.	N.D.	N.D.	N.D.	N.D.	N.D.	N.D.	N.D.	N.D.	N.D.	N.D.	N.D.	N.D.	N.D.	N.D.	N.D.	N.D.
N6-isopentenyladenosine	i6A	Yes	t	5266.47	9838.75	7676.57	8285.45	10501.1	9499.05	7243.9	8815.06	10926.2	10325.8	11125.7	10797	7873.97	6961.11	7297.53	8050.27	8061.73	7679.15	8195.65	10710.7	11053.5	8869.53	10613	9794.37	9632.97	10149.8	9470.77	9918.11	10111	10904.3	N.D.	N.D.	N.D.	N.D.	N.D.	N.D.	N.D.	N.D.	N.D.	N.D.	N.D.	N.D.	N.D.	N.D.	N.D.	N.D.
N2,N7-dimethylguanosine	m2,7G	Yes	sn, sno	N.D.	N.D.	N.D.	N.D.	N.D.	N.D.	N.D.	N.D.	N.D.	N.D.	N.D.	N.D.	N.D.	N.D.	N.D.	N.D.	N.D.	N.D.	N.D.	N.D.	N.D.	N.D.	N.D.	N.D.	N.D.	N.D.	N.D.	N.D.	N.D.	N.D.	N.D.	N.D.	N.D.	N.D.	N.D.	N.D.	N.D.	N.D.	N.D.	N.D.	N.D.	N.D.	N.D.	N.D.	N.D.	N.D.
6-methyluridine	m6U	No	NF	N.D.	N.D.	N.D.	N.D.	N.D.	N.D.	N.D.	N.D.	N.D.	N.D.	N.D.	N.D.	N.D.	N.D.	N.D.	N.D.	N.D.	N.D.	N.D.	N.D.	N.D.	N.D.	N.D.	N.D.	N.D.	N.D.	N.D.	N.D.	N.D.	N.D.	N.D.	N.D.	N.D.	N.D.	N.D.	N.D.	N.D.	N.D.	N.D.	N.D.	N.D.	N.D.	N.D.	N.D.	N.D.	N.D.
5,2'-O-dimethylcytidine	m5Cm	No	NF	N.D.	N.D.	N.D.	N.D.	N.D.	N.D.	N.D.	N.D.	N.D.	N.D.	N.D.	N.D.	N.D.	N.D.	N.D.	N.D.	N.D.	N.D.	N.D.	N.D.	N.D.	N.D.	N.D.	N.D.	N.D.	N.D.	N.D.	N.D.	N.D.	N.D.	N.D.	N.D.	N.D.	N.D.	N.D.	N.D.	N.D.	N.D.	N.D.	N.D.	N.D.	N.D.	N.D.	N.D.	N.D.	N.D.
5-carboxymethyluridine	cm5U	Yes	t	150.466	249.885	181.31	198.45	239.596	188.165	184.737	249.885	263.605	260.175	308.204	239.596	135.66	268.55	178.388	213.076	184.643	266.54	273.896	280.757	256.745	222.45	297.911	260.175	246.456	280.757	222.45	260.175	219.021	236.167	N.D.	N.D.	N.D.	N.D.	N.D.	N.D.	N.D.	N.D.	N.D.	N.D.	N.D.	N.D.	N.D.	N.D.	N.D.	N.D.
2-thiocytidine	s2C	No	t	N.D.	N.D.	N.D.	N.D.	N.D.	N.D.	N.D.	N.D.	N.D.	N.D.	N.D.	N.D.	N.D.	N.D.	N.D.	N.D.	N.D.	N.D.	N.D.	N.D.	N.D.	N.D.	N.D.	N.D.	N.D.	N.D.	N.D.	N.D.	N.D.	N.D.	N.D.	N.D.	N.D.	N.D.	N.D.	N.D.	N.D.	N.D.	N.D.	N.D.	N.D.	N.D.	N.D.	N.D.	N.D.	N.D.
2′-O-methylinosine	Im	No	r	N.D.	N.D.	N.D.	N.D.	N.D.	N.D.	N.D.	N.D.	N.D.	N.D.	N.D.	N.D.	N.D.	N.D.	N.D.	N.D.	N.D.	N.D.	N.D.	N.D.	N.D.	N.D.	N.D.	N.D.	N.D.	N.D.	N.D.	N.D.	N.D.	N.D.	N.D.	N.D.	N.D.	N.D.	N.D.	N.D.	N.D.	N.D.	N.D.	N.D.	N.D.	N.D.	N.D.	N.D.	N.D.	N.D.
5-methoxycarbonylmethyluridine	mcm5U	Yes	t	1588.13	2777.2	2088.08	2440.96	2956.47	2666.19	2251.87	2659.03	3046.22	3186.34	3294.24	3265.46	2868.85	3137.92	2882.06	3112.5	3305.46	3044.25	2594.63	3640.08	3549.94	2899.08	3625.65	3193.53	2730.63	3330.22	2809.45	3046.22	3031.85	2956.47	N.D.	N.D.	N.D.	N.D.	N.D.	N.D.	N.D.	N.D.	N.D.	N.D.	N.D.	N.D.	N.D.	N.D.	N.D.	N.D.
5-carboxymethylaminomethyluridine	cmnm5U	Yes	t	29.3573	29.3573	41.9679	16.7576	29.3573	33.5599	8.3676	37.7634	54.5858	71.4183	37.7634	33.5599	57.885	65.34	45.36	84.779	86.156	78.455	29.3573	12.5612	12.5612	25.156	16.7576	25.156	37.7634	29.3573	12.5612	58.7931	25.156	20.9559	N.D.	N.D.	N.D.	N.D.	N.D.	N.D.	N.D.	N.D.	N.D.	N.D.	N.D.	N.D.	N.D.	N.D.	N.D.	N.D.
5-methoxyuridine	mo5U	No	t	N.D.	N.D.	N.D.	N.D.	N.D.	N.D.	N.D.	N.D.	N.D.	N.D.	N.D.	N.D.	N.D.	N.D.	N.D.	N.D.	N.D.	N.D.	N.D.	N.D.	N.D.	N.D.	N.D.	N.D.	N.D.	N.D.	N.D.	N.D.	N.D.	N.D.	N.D.	N.D.	N.D.	N.D.	N.D.	N.D.	N.D.	N.D.	N.D.	N.D.	N.D.	N.D.	N.D.	N.D.	N.D.	N.D.
3-(3-amino-3-carboxypropyl)uridine	acp3U	No	r, t	N.D.	N.D.	N.D.	N.D.	N.D.	N.D.	N.D.	N.D.	N.D.	N.D.	N.D.	N.D.	N.D.	N.D.	N.D.	N.D.	N.D.	N.D.	N.D.	N.D.	N.D.	N.D.	N.D.	N.D.	N.D.	N.D.	N.D.	N.D.	N.D.	N.D.	N.D.	N.D.	N.D.	N.D.	N.D.	N.D.	N.D.	N.D.	N.D.	N.D.	N.D.	N.D.	N.D.	N.D.	N.D.	N.D.
uridine 5-oxyacetic acid	cmo5U	No	t	N.D.	N.D.	N.D.	N.D.	N.D.	N.D.	N.D.	N.D.	N.D.	N.D.	N.D.	N.D.	N.D.	N.D.	N.D.	N.D.	N.D.	N.D.	N.D.	N.D.	N.D.	N.D.	N.D.	N.D.	N.D.	N.D.	N.D.	N.D.	N.D.	N.D.	N.D.	N.D.	N.D.	N.D.	N.D.	N.D.	N.D.	N.D.	N.D.	N.D.	N.D.	N.D.	N.D.	N.D.	N.D.	N.D.
2,8-dimethyladenosine	m2,8A	No	r	N.D.	N.D.	N.D.	N.D.	N.D.	N.D.	N.D.	N.D.	N.D.	N.D.	N.D.	N.D.	N.D.	N.D.	N.D.	N.D.	N.D.	N.D.	N.D.	N.D.	N.D.	N.D.	N.D.	N.D.	N.D.	N.D.	N.D.	N.D.	N.D.	N.D.	N.D.	N.D.	N.D.	N.D.	N.D.	N.D.	N.D.	N.D.	N.D.	N.D.	N.D.	N.D.	N.D.	N.D.	N.D.	N.D.
5-methoxycarbonylmethyl-2-thiouridine	mcm5s2U	Yes	t	2078.45	3625.4	3129.33	2858.44	4089.84	3795.94	2486.88	2937.99	4062.34	3841.95	3860.35	3975.19	4848.9	4854.77	4766.6	5422.66	5146.32	4991.51	2708.32	3324.58	3546.88	2759.98	3157.26	3189.84	3282.8	3380.24	3593.08	3463.62	3533.01	3745.29	N.D.	N.D.	N.D.	N.D.	N.D.	N.D.	N.D.	N.D.	N.D.	N.D.	N.D.	N.D.	N.D.	N.D.	N.D.	N.D.
N2,N2,N7-trimethylguanosine	m3G	Yes	sn, sno	N.D.	N.D.	N.D.	N.D.	N.D.	N.D.	N.D.	N.D.	N.D.	N.D.	N.D.	N.D.	N.D.	N.D.	N.D.	N.D.	N.D.	N.D.	N.D.	N.D.	N.D.	N.D.	N.D.	N.D.	N.D.	N.D.	N.D.	N.D.	N.D.	N.D.	N.D.	N.D.	N.D.	N.D.	N.D.	N.D.	N.D.	N.D.	N.D.	N.D.	N.D.	N.D.	N.D.	N.D.	N.D.	N.D.
5,2′-O-dimethyluridine	m5Um	No	t	N.D.	N.D.	N.D.	N.D.	N.D.	N.D.	N.D.	N.D.	N.D.	N.D.	N.D.	N.D.	N.D.	N.D.	N.D.	N.D.	N.D.	N.D.	N.D.	N.D.	N.D.	N.D.	N.D.	N.D.	N.D.	N.D.	N.D.	N.D.	N.D.	N.D.	N.D.	N.D.	N.D.	N.D.	N.D.	N.D.	N.D.	N.D.	N.D.	N.D.	N.D.	N.D.	N.D.	N.D.	N.D.	N.D.
2-methylthio-N6-threonylcarbamoyladenosine	ms2t6A	No	t	N.D.	N.D.	N.D.	N.D.	N.D.	N.D.	N.D.	N.D.	N.D.	N.D.	N.D.	N.D.	N.D.	N.D.	N.D.	N.D.	N.D.	N.D.	N.D.	N.D.	N.D.	N.D.	N.D.	N.D.	N.D.	N.D.	N.D.	N.D.	N.D.	N.D.	N.D.	N.D.	N.D.	N.D.	N.D.	N.D.	N.D.	N.D.	N.D.	N.D.	N.D.	N.D.	N.D.	N.D.	N.D.	N.D.
4-thiouridine	s4U	No	t	N.D.	N.D.	N.D.	N.D.	N.D.	N.D.	N.D.	N.D.	N.D.	N.D.	N.D.	N.D.	N.D.	N.D.	N.D.	N.D.	N.D.	N.D.	N.D.	N.D.	N.D.	N.D.	N.D.	N.D.	N.D.	N.D.	N.D.	N.D.	N.D.	N.D.	N.D.	N.D.	N.D.	N.D.	N.D.	N.D.	N.D.	N.D.	N.D.	N.D.	N.D.	N.D.	N.D.	N.D.	N.D.	N.D.
N6-threonylcarbamoyladenosine	t6A	Yes	t	6000.06	10198.1	7765.31	8904.99	10827.4	9912.49	7828.33	9645.22	11623.1	11340.7	12264.5	11588.2	9476.1	9163.75	8876.87	10265.7	9642.75	10043.9	8818.7	11182.9	11842.4	9409.51	11574.9	10845.7	9970.6	11189.5	10115	10427.2	10349.2	10878.9	N.D.	N.D.	N.D.	N.D.	N.D.	N.D.	N.D.	N.D.	N.D.	N.D.	N.D.	N.D.	N.D.	N.D.	N.D.	N.D.
2-thiouridine	s2U	Yes	t	N.D.	N.D.	N.D.	N.D.	N.D.	N.D.	N.D.	N.D.	N.D.	N.D.	N.D.	N.D.	N.D.	N.D.	N.D.	N.D.	N.D.	N.D.	N.D.	N.D.	N.D.	N.D.	N.D.	N.D.	N.D.	N.D.	N.D.	N.D.	N.D.	N.D.	N.D.	N.D.	N.D.	N.D.	N.D.	N.D.	N.D.	N.D.	N.D.	N.D.	N.D.	N.D.	N.D.	N.D.	N.D.	N.D.
5-methyl-2-thiouridine	m5s2U	No	t	N.D.	N.D.	N.D.	N.D.	N.D.	N.D.	N.D.	N.D.	N.D.	N.D.	N.D.	N.D.	N.D.	N.D.	N.D.	N.D.	N.D.	N.D.	N.D.	N.D.	N.D.	N.D.	N.D.	N.D.	N.D.	N.D.	N.D.	N.D.	N.D.	N.D.	N.D.	N.D.	N.D.	N.D.	N.D.	N.D.	N.D.	N.D.	N.D.	N.D.	N.D.	N.D.	N.D.	N.D.	N.D.	N.D.
3-methyluridine	m3U	Yes	r	5878.15	10069.1	7571.59	9238.1	10804.5	9784.31	7548.37	9092.86	10694.1	10284.2	11502.4	10420.8	9752.76	10247.4	8175.26	10190.4	10395.1	9039.88	7760.21	10019.7	10057.5	8552.69	10429.5	9874.39	9653.55	10455.7	9087.05	9865.67	9548.95	9653.55	N.D.	N.D.	N.D.	N.D.	N.D.	N.D.	N.D.	N.D.	N.D.	N.D.	N.D.	N.D.	N.D.	N.D.	N.D.	N.D.
* PTM classes were taken from http://modomics.genesilico.pl websites. m, r, sn , sno and t stands for mRNA, rRNA, snRNA, snoRNA and tRNA respectively. Nf means not found in any databases
N.D. stands for not detected
[truncated: 14 more columns]

## Sheet: Table S5
Table S5: Modification Percentage of UHLPC-MS/MS analysis WT and KO cell types. Measurements were done in triplicates (technical replicate) for each sample and each measurement represents modification percentage (modification/canonical base %).
Nucleoside	Abbreviation	Found in S. cerevisiae	PTM Class	WT total RNA replicate 1			WT total RNA replicate 2			Δtrm1 total RNA replicate 1			Δtrm1 total RNA replicate 2			Δtrm2 total RNA replicate 1			Δtrm2 total RNA replicate 2			Δtrm10 total RNA replicate 1			Δtrm10 total RNA replicate 2			Δtrm11 total RNA replicate 1			Δtrm11 total RNA replicate 2			WT mRNA replicate 1			WT mRNA replicate 2			Δtrm1 mRNA replicate 1			Δtrm1 mRNA replicate 2			Δtrm2 mRNA replicate 1			Δtrm2 mRNA replicate 2
Dihydrouridine	D	Yes	r, t	1.78603	1.93903	1.93766	1.85957	1.92679	1.86795	1.90835	1.91595	2.04842	2.10041	2.03593	2.01907	2.10101	2.03218	2.07228	1.87271	1.8391	2.02986	1.97901	2.12208	2.13613	2.02696	2.06418	1.99082	1.98553	2.04632	2.01859	2.06235	2.05016	2.09471	N.D.	N.D.	N.D.	N.D.	N.D.	N.D.	N.D.	N.D.	N.D.	N.D.	N.D.	N.D.	N.D.	N.D.	N.D.	N.D.
5-hydroxymethylcytidine	hm5C	No	m, r	N.D.	N.D.	N.D.	N.D.	N.D.	N.D.	N.D.	N.D.	N.D.	N.D.	N.D.	N.D.	N.D.	N.D.	N.D.	N.D.	N.D.	N.D.	N.D.	N.D.	N.D.	N.D.	N.D.	N.D.	N.D.	N.D.	N.D.	N.D.	N.D.	N.D.	N.D.	N.D.	N.D.	N.D.	N.D.	N.D.	N.D.	N.D.	N.D.	N.D.	N.D.	N.D.	N.D.	N.D.	N.D.	N.D.
Pseudouridine	Ψ	Yes	m, r, sn, sno, t	4.43032	4.7787	4.90751	4.78469	4.947	4.94078	4.68755	4.85959	5.17911	5.14772	5.14979	5.03555	4.57429	4.6045	4.71935	4.60005	4.54114	4.9016	4.88032	5.03669	5.09514	4.7922	5.02142	4.88413	4.84855	5.14489	5.14155	5.06135	5.08298	5.04998	0.0198923	0.0247169	0.0263628	0.0257459	0.018216	0.027405	0.0174306	0.0218714	0.0217373	0.0174002	0.0193063	0.0189217	0.0256761	0.0196275	0.0302589	0.0244268
3-methylcytidine	m3C	Yes	m, t	0.0411887	0.0418685	0.0435366	0.0425901	0.0435946	0.0421156	0.0417001	0.0403163	0.0426013	0.0429125	0.0439041	0.0439702	0.0637372	0.0651281	0.0673927	0.064681	0.0648711	0.0674546	0.046961	0.0483571	0.0486025	0.0483088	0.050687	0.051764	0.0439451	0.0443251	0.0453383	0.0438628	0.0460722	0.0454726	N.D.	N.D.	N.D.	N.D.	N.D.	N.D.	N.D.	N.D.	N.D.	N.D.	N.D.	N.D.	0.000428214	0.000465431	0.000378346	0.000512677
1-methyladenosine	m1A	Yes	m, r, t	0.212136	0.227024	0.226921	0.226337	0.220452	0.221276	0.230284	0.224768	0.224063	0.258152	0.229101	0.233153	0.354991	0.35213	0.346383	0.350005	0.342927	0.360184	0.228378	0.226126	0.228618	0.235717	0.239375	0.251432	0.226017	0.222168	0.219201	0.229173	0.224179	0.226177	0.000161145	0.00010375	8.61822e-05	0.000213068	0.000122207	0.000126378	0.000144472	0.000303438	0.000127634	0.00014867	0.00018236	0.000122752	0.000139139	0.000130655	0.00013909	0.000149497
5-hydroxyuridine	ho5U	No	t	N.D.	N.D.	N.D.	N.D.	N.D.	N.D.	N.D.	N.D.	N.D.	N.D.	N.D.	N.D.	N.D.	N.D.	N.D.	N.D.	N.D.	N.D.	N.D.	N.D.	N.D.	N.D.	N.D.	N.D.	N.D.	N.D.	N.D.	N.D.	N.D.	N.D.	N.D.	N.D.	N.D.	N.D.	N.D.	N.D.	N.D.	N.D.	N.D.	N.D.	N.D.	N.D.	N.D.	N.D.	N.D.	N.D.
5-methylcytidine	m5C	Yes	m, r, t	0.751254	0.813633	0.762935	0.849314	0.812198	0.79557	0.81167	0.813543	0.81375	0.8111	0.808546	0.809168	0.633152	0.650628	0.643374	0.733199	0.731753	0.705696	0.868274	0.847438	0.844201	0.858168	0.866939	0.849645	0.823838	0.815159	0.806271	0.849405	0.833834	0.809852	0.00519098	0.00544365	0.0039985	0.00562446	0.00508382	0.00542002	0.00453442	0.00414176	0.00477126	0.00449136	0.00511194	0.00544995	0.00447215	0.00438973	0.00475807	0.00465869
1-methylpseudouridine	m1Ψ	Yes	r, t	0.00294262	0.0034146	0.00280061	0.0043425	0.00427501	0.00368573	0.00408042	0.00317265	0.00302287	0.00538044	0.00360161	0.00488116	0.00397874	0.00378889	0.00403017	0.00449302	0.00480916	0.00475424	0.00383342	0.00416674	0.0037467	0.00349575	0.00401256	0.0030583	0.00564229	0.00367556	0.00383563	0.00442026	0.00444095	0.00398609	N.D.	N.D.	N.D.	N.D.	N.D.	N.D.	N.D.	N.D.	N.D.	N.D.	N.D.	N.D.	N.D.	N.D.	N.D.	N.D.
7-methylguanosine	m7G	Yes	m, r, t	0.14826	0.145506	0.128643	0.146117	0.144788	0.138321	0.171773	0.139733	0.139925	0.184752	0.142271	0.149618	0.180528	0.172393	0.169936	0.172413	0.173875	0.180984	0.145572	0.142498	0.149495	0.151982	0.153097	0.169671	0.154591	0.144713	0.136848	0.153156	0.143243	0.140944	0.015362	0.0244222	0.0226913	0.0251223	0.018384	0.0149507	0.023996	0.0234947	0.0199037	0.0235767	0.0308673	0.0257313	0.0159558	0.0162099	0.0164609	0.0164881
2′-O-methylcytidine	Cm	Yes	m, r, sn, t	1.29677	1.38871	1.3404	1.43926	1.39452	1.38921	1.40049	1.39727	1.40298	1.42229	1.381	1.37764	1.22317	1.25548	1.17509	1.19961	1.2796	1.2119	1.36694	1.36024	1.35937	1.39566	1.39427	1.46202	1.3914	1.39363	1.38059	1.38926	1.35476	1.36411	0.00226182	0.00216985	0.00267926	0.00408276	0.00432555	0.00458535	0.00320448	0.00303864	0.00218867	0.00305177	0.00281086	0.00297323	0.00240808	0.00225712	0.00249695	0.00263068
Inosine	I	Yes	m, t	0.10154	0.107806	0.264804	0.108494	0.102622	0.10158	0.115006	0.109387	0.106111	0.122375	0.102873	0.105823	0.10487	0.114733	0.138021	0.117784	0.111927	0.106977	0.111254	0.107127	0.104206	0.112754	0.110224	0.107386	0.111371	0.102945	0.103061	0.118865	0.112133	0.107631	N.D.	N.D.	N.D.	N.D.	N.D.	N.D.	N.D.	N.D.	N.D.	N.D.	N.D.	N.D.	0.0048181	0.0131338	0.00728451	0.00847236
5-methyluridine	m5U	Yes	m, r, t	0.438782	0.484379	0.464157	0.460831	0.475387	0.461473	0.464797	0.483169	0.5112	0.517625	0.49218	0.491542	0.0338445	0.0317546	0.0322133	0.0326754	0.0317525	0.0338365	0.53235	0.536087	0.545473	0.515209	0.514516	0.494979	0.505734	0.494559	0.487924	0.515657	0.523339	0.509609	0.00103933	0.000988166	0.00110096	0.000902523	0.00078356	0.000840168	0.00103102	0.00112484	0.000501232	0.000813574	0.000760466	0.000699819	0.000330532	0.000546469	0.000272474	0.000289396
5-formylcytidine	f5C	Yes	m, t	N.D.	N.D.	N.D.	N.D.	N.D.	N.D.	N.D.	N.D.	N.D.	N.D.	N.D.	N.D.	N.D.	N.D.	N.D.	N.D.	N.D.	N.D.	N.D.	N.D.	N.D.	N.D.	N.D.	N.D.	N.D.	N.D.	N.D.	N.D.	N.D.	N.D.	N.D.	N.D.	N.D.	N.D.	N.D.	N.D.	N.D.	N.D.	N.D.	N.D.	N.D.	N.D.	N.D.	N.D.	N.D.	N.D.
2′-O-methyluridine	Um	Yes	m, r, sn, sno, t	0.592266	0.672063	0.599813	0.648068	0.676339	0.64751	0.62436	0.656095	0.67398	0.682535	0.647529	0.632011	0.576912	0.563465	0.60028	0.615398	0.614749	0.616227	0.648989	0.644769	0.649779	0.651581	0.643948	0.643465	0.657844	0.652852	0.641976	0.646232	0.658977	0.663135	0.00155754	0.00161977	0.0022911	0.00264436	0.000693981	0.00241616	0.00151035	0.00104409	0.000461939	0.00133714	0.000749603	0.00111517	0.0018917	0.00192512	0.00138203	0.00187485
2-methyladenosine	m2A	No	r, t	N.D.	N.D.	N.D.	N.D.	N.D.	N.D.	N.D.	N.D.	N.D.	N.D.	N.D.	N.D.	N.D.	N.D.	N.D.	N.D.	N.D.	N.D.	N.D.	N.D.	N.D.	N.D.	N.D.	N.D.	N.D.	N.D.	N.D.	N.D.	N.D.	N.D.	N.D.	N.D.	N.D.	N.D.	N.D.	N.D.	N.D.	N.D.	N.D.	N.D.	N.D.	N.D.	N.D.	N.D.	N.D.	N.D.
1-methylguanosine	m1G	Yes	m, r, t	0.377602	0.40405	0.352457	0.399629	0.393613	0.357112	0.426143	0.425784	0.417626	0.497715	0.431427	0.417121	0.385879	0.387219	0.391289	0.409855	0.399703	0.405822	0.155355	0.150621	0.146822	0.154916	0.150856	0.149663	0.417961	0.398002	0.378067	0.443559	0.414628	0.394897	0.000574947	0.000611923	0.000522279	0.000584919	0.000937662	0.000571009	0.000627274	0.00067982	0.000625945	0.000706147	0.000454966	0.000590532	0.000880288	0.000728339	0.000606818	0.000715089
2′-O-methylguanosine	Gm	Yes	m, r, sn, t	1.11281	1.17922	1.0867	1.21257	1.20476	1.12801	1.16111	1.14513	1.12904	1.30298	1.13333	1.10445	1.00251	1.0029	1.00451	0.995258	1.00619	0.991011	1.19543	1.16496	1.13436	1.22839	1.18207	1.21586	1.18041	1.14178	1.1088	1.2153	1.15805	1.11657	0.00393621	0.00436884	0.00382747	0.00576188	0.00551336	0.00598625	0.00442664	0.00389989	0.0038627	0.00452967	0.00491015	0.00465003	0.00468755	0.00508867	0.00522479	0.00569
1-methylinosine	m1I	Yes	t	0.0313125	0.0293884	0.0278243	0.0289427	0.0275072	0.0276244	0.029779	0.0291576	0.0297539	0.0326473	0.0282757	0.0283234	0.0265306	0.0275098	0.0232846	0.0277063	0.0247513	0.0263397	0.0313542	0.0306326	0.029984	0.0330859	0.0288862	0.0314855	0.028033	0.0273509	0.028992	0.0304721	0.0290129	0.0300472	N.D.	N.D.	N.D.	N.D.	N.D.	N.D.	N.D.	N.D.	N.D.	N.D.	N.D.	N.D.	N.D.	N.D.	N.D.	N.D.
N2-methylguanosine	m2G	Yes	r, sn, t	0.332592	0.361573	0.32712	0.357856	0.351038	0.335411	0.335084	0.3416	0.351005	0.380475	0.341234	0.338625	0.376416	0.351149	0.357521	0.373926	0.362935	0.417508	0.357355	0.367008	0.361794	0.368179	0.369637	0.35312	0.00453402	0.00471214	0.00472428	0.00511473	0.00435304	0.00441496	0.000879191	0.000714383	0.000803372	0.00089444	0.000756806	0.000952933	0.00058044	0.000667166	0.00087998	0.000768426	0.000729179	0.000683992	0.0011526	0.00146395	0.00118151	0.00119046
N4-acetylcytidine	ac4C	Yes	m ,r, t	0.218738	0.227992	0.216665	0.23411	0.220295	0.218574	0.248373	0.21887	0.219771	0.255936	0.219489	0.232083	0.261608	0.27933	0.259732	0.278434	0.265756	0.272065	0.229627	0.217255	0.246822	0.230813	0.2242	0.240368	0.236661	0.231383	0.224928	0.229909	0.224949	0.232711	N.D.	N.D.	N.D.	N.D.	N.D.	N.D.	N.D.	N.D.	N.D.	N.D.	N.D.	N.D.	N.D.	N.D.	N.D.	N.D.
2′-O-methyladenosine	Am	Yes	m, r, sn, sno, t	1.25641	1.2207	1.218	1.2538	1.20729	1.20513	1.26078	1.21874	1.17294	1.3198	1.18984	1.17111	1.22262	1.25057	1.23117	1.24206	1.20371	1.23863	1.21377	1.17448	1.16959	1.27233	1.19934	1.27887	1.2193	1.21196	1.20332	1.24306	1.20026	1.18686	0.00113184	0.0011685	0.00113921	0.00184471	0.00187893	0.00193059	0.00110639	0.00112515	0.00109966	0.0012697	0.00111495	0.00115518	0.00135775	0.00161955	0.00164261	0.00148765
N6-methyladenosine	m6A	Yes	m, r, sn, t	0.123955	0.12282	0.12145	0.128744	0.121495	0.119565	0.117152	0.132516	0.118325	0.12118	0.123643	0.114399	0.101962	0.1088	0.105225	0.107861	0.103596	0.10478	0.129824	0.125153	0.107409	0.129926	0.122549	0.127077	0.119782	0.117428	0.119972	0.129715	0.123855	0.114627	0.000236523	0.0002531	0.000235019	0.000408978	0.000403373	0.000386985	0.000260396	0.000293939	0.000220314	0.000304112	0.000295925	0.000264859	0.000315473	0.000311151	0.000346626	0.000363559
N2,N2-dimethylguanosine	m22G	Yes	r, t	0.301651	0.31405	0.289918	0.311391	0.312164	0.291574	0.000370633	0.000384527	0.000538328	0.000595416	0.000503842	0.000451946	0.333848	0.336584	0.336201	0.346607	0.348816	0.360565	0.323335	0.324375	0.31123	0.331244	0.321668	0.330441	0.315486	0.30503	0.304562	0.332939	0.323506	0.312708	0.000412787	0.000465513	0.00046618	0.000539849	0.000722715	0.000557541	0.000102938	0.000191658	0.000151885	0.000182124	0.000176256	8.22436e-05	0.000645255	0.000711921	0.000734346	0.000680568
N6,2′-O-dimethyladenosine	m6Am	No	m, sn	N.D.	N.D.	N.D.	N.D.	N.D.	N.D.	N.D.	N.D.	N.D.	N.D.	N.D.	N.D.	N.D.	N.D.	N.D.	N.D.	N.D.	N.D.	N.D.	N.D.	N.D.	N.D.	N.D.	N.D.	N.D.	N.D.	N.D.	N.D.	N.D.	N.D.	N.D.	N.D.	N.D.	N.D.	N.D.	N.D.	N.D.	N.D.	N.D.	N.D.	N.D.	N.D.	N.D.	N.D.	N.D.	N.D.
N6-isopentenyladenosine	i6A	Yes	t	0.0717876	0.0813702	0.082909	0.0769122	0.0782993	0.0810146	0.0798077	0.0791423	0.0814303	0.0907406	0.0800725	0.0818696	0.0711273	0.0652904	0.0676442	0.0684964	0.0676187	0.0665533	0.0842879	0.0844417	0.0858098	0.0857156	0.0824553	0.0882889	0.0818415	0.0778696	0.0824949	0.084366	0.0852531	0.0895144	N.D.	N.D.	N.D.	N.D.	N.D.	N.D.	N.D.	N.D.	N.D.	N.D.	N.D.	N.D.	N.D.	N.D.	N.D.	N.D.
N2,N7-dimethylguanosine	m2,7G	Yes	sn, sno	N.D.	N.D.	N.D.	N.D.	N.D.	N.D.	N.D.	N.D.	N.D.	N.D.	N.D.	N.D.	N.D.	N.D.	N.D.	N.D.	N.D.	N.D.	N.D.	N.D.	N.D.	N.D.	N.D.	N.D.	N.D.	N.D.	N.D.	N.D.	N.D.	N.D.	N.D.	N.D.	N.D.	N.D.	N.D.	N.D.	N.D.	N.D.	N.D.	N.D.	N.D.	N.D.	N.D.	N.D.	N.D.	N.D.
6-methyluridine	m6U	No	NF	N.D.	N.D.	N.D.	N.D.	N.D.	N.D.	N.D.	N.D.	N.D.	N.D.	N.D.	N.D.	N.D.	N.D.	N.D.	N.D.	N.D.	N.D.	N.D.	N.D.	N.D.	N.D.	N.D.	N.D.	N.D.	N.D.	N.D.	N.D.	N.D.	N.D.	N.D.	N.D.	N.D.	N.D.	N.D.	N.D.	N.D.	N.D.	N.D.	N.D.	N.D.	N.D.	N.D.	N.D.	N.D.	N.D.
5,2'-O-dimethylcytidine	m5Cm	No	NF	N.D.	N.D.	N.D.	N.D.	N.D.	N.D.	N.D.	N.D.	N.D.	N.D.	N.D.	N.D.	N.D.	N.D.	N.D.	N.D.	N.D.	N.D.	N.D.	N.D.	N.D.	N.D.	N.D.	N.D.	N.D.	N.D.	N.D.	N.D.	N.D.	N.D.	N.D.	N.D.	N.D.	N.D.	N.D.	N.D.	N.D.	N.D.	N.D.	N.D.	N.D.	N.D.	N.D.	N.D.	N.D.	N.D.
5-carboxymethyluridine	cm5U	Yes	t	0.0018363	0.00203615	0.00180043	0.00176641	0.00179495	0.00155305	0.00185981	0.00217718	0.00203494	0.00205462	0.00221278	0.00182798	0.00120069	0.00243674	0.00164625	0.00176165	0.00151281	0.00236964	0.00268133	0.00221048	0.00202905	0.00198587	0.00225874	0.002032	0.00208335	0.00211522	0.0019107	0.00217306	0.00183789	0.0019296	N.D.	N.D.	N.D.	N.D.	N.D.	N.D.	N.D.	N.D.	N.D.	N.D.	N.D.	N.D.	N.D.	N.D.	N.D.	N.D.
2-thiocytidine	s2C	No	t	N.D.	N.D.	N.D.	N.D.	N.D.	N.D.	N.D.	N.D.	N.D.	N.D.	N.D.	N.D.	N.D.	N.D.	N.D.	N.D.	N.D.	N.D.	N.D.	N.D.	N.D.	N.D.	N.D.	N.D.	N.D.	N.D.	N.D.	N.D.	N.D.	N.D.	N.D.	N.D.	N.D.	N.D.	N.D.	N.D.	N.D.	N.D.	N.D.	N.D.	N.D.	N.D.	N.D.	N.D.	N.D.	N.D.
2′-O-methylinosine	Im	No	r	N.D.	N.D.	N.D.	N.D.	N.D.	N.D.	N.D.	N.D.	N.D.	N.D.	N.D.	N.D.	N.D.	N.D.	N.D.	N.D.	N.D.	N.D.	N.D.	N.D.	N.D.	N.D.	N.D.	N.D.	N.D.	N.D.	N.D.	N.D.	N.D.	N.D.	N.D.	N.D.	N.D.	N.D.	N.D.	N.D.	N.D.	N.D.	N.D.	N.D.	N.D.	N.D.	N.D.	N.D.	N.D.	N.D.
5-methoxycarbonylmethyluridine	mcm5U	Yes	t	0.0193816	0.0226296	0.0207349	0.0217271	0.0221486	0.0220058	0.0226703	0.0231674	0.0235157	0.0251627	0.0236513	0.0249136	0.0253913	0.0284725	0.0265971	0.0257332	0.0270821	0.0270645	0.0254004	0.0286594	0.028055	0.0258808	0.0274895	0.0249419	0.0230827	0.0250899	0.0241313	0.0254429	0.0254415	0.0241559	N.D.	N.D.	N.D.	N.D.	N.D.	N.D.	N.D.	N.D.	N.D.	N.D.	N.D.	N.D.	N.D.	N.D.	N.D.	N.D.
5-carboxymethylaminomethyluridine	cmnm5U	Yes	t	0.000358278	0.000239214	0.000416746	0.00014916	0.000219932	0.000276992	8.42393e-05	0.000329022	0.000421383	0.000563994	0.000271126	0.000256043	0.000512322	0.000592875	0.000418605	0.000700926	0.000705889	0.000697494	0.000287396	9.88978e-05	9.92708e-05	0.000224574	0.000127055	0.000196471	0.000319223	0.000221178	0.000107893	0.000491058	0.000211094	0.000171221	N.D.	N.D.	N.D.	N.D.	N.D.	N.D.	N.D.	N.D.	N.D.	N.D.	N.D.	N.D.	N.D.	N.D.	N.D.	N.D.
5-methoxyuridine	mo5U	No	t	N.D.	N.D.	N.D.	N.D.	N.D.	N.D.	N.D.	N.D.	N.D.	N.D.	N.D.	N.D.	N.D.	N.D.	N.D.	N.D.	N.D.	N.D.	N.D.	N.D.	N.D.	N.D.	N.D.	N.D.	N.D.	N.D.	N.D.	N.D.	N.D.	N.D.	N.D.	N.D.	N.D.	N.D.	N.D.	N.D.	N.D.	N.D.	N.D.	N.D.	N.D.	N.D.	N.D.	N.D.	N.D.	N.D.
3-(3-amino-3-carboxypropyl)uridine	acp3U	No	r, t	N.D.	N.D.	N.D.	N.D.	N.D.	N.D.	N.D.	N.D.	N.D.	N.D.	N.D.	N.D.	N.D.	N.D.	N.D.	N.D.	N.D.	N.D.	N.D.	N.D.	N.D.	N.D.	N.D.	N.D.	N.D.	N.D.	N.D.	N.D.	N.D.	N.D.	N.D.	N.D.	N.D.	N.D.	N.D.	N.D.	N.D.	N.D.	N.D.	N.D.	N.D.	N.D.	N.D.	N.D.	N.D.	N.D.
uridine 5-oxyacetic acid	cmo5U	No	t	N.D.	N.D.	N.D.	N.D.	N.D.	N.D.	N.D.	N.D.	N.D.	N.D.	N.D.	N.D.	N.D.	N.D.	N.D.	N.D.	N.D.	N.D.	N.D.	N.D.	N.D.	N.D.	N.D.	N.D.	N.D.	N.D.	N.D.	N.D.	N.D.	N.D.	N.D.	N.D.	N.D.	N.D.	N.D.	N.D.	N.D.	N.D.	N.D.	N.D.	N.D.	N.D.	N.D.	N.D.	N.D.	N.D.
2,8-dimethyladenosine	m2,8A	No	r	N.D.	N.D.	N.D.	N.D.	N.D.	N.D.	N.D.	N.D.	N.D.	N.D.	N.D.	N.D.	N.D.	N.D.	N.D.	N.D.	N.D.	N.D.	N.D.	N.D.	N.D.	N.D.	N.D.	N.D.	N.D.	N.D.	N.D.	N.D.	N.D.	N.D.	N.D.	N.D.	N.D.	N.D.	N.D.	N.D.	N.D.	N.D.	N.D.	N.D.	N.D.	N.D.	N.D.	N.D.	N.D.	N.D.
5-methoxycarbonylmethyl-2-thiouridine	mcm5s2U	Yes	t	0.0253656	0.029541	0.0310746	0.0254431	0.0306393	0.0313304	0.0250362	0.0255979	0.0313598	0.0303401	0.0277157	0.0303284	0.0429161	0.0440507	0.0439886	0.0448329	0.0421645	0.0443763	0.0265133	0.0261753	0.0280308	0.024639	0.0239382	0.0249131	0.0277503	0.0254667	0.0308622	0.0289292	0.0296469	0.0306009	N.D.	N.D.	N.D.	N.D.	N.D.	N.D.	N.D.	N.D.	N.D.	N.D.	N.D.	N.D.	N.D.	N.D.	N.D.	N.D.
N2,N2,N7-trimethylguanosine	m3G	Yes	sn, sno	N.D.	N.D.	N.D.	N.D.	N.D.	N.D.	N.D.	N.D.	N.D.	N.D.	N.D.	N.D.	N.D.	N.D.	N.D.	N.D.	N.D.	N.D.	N.D.	N.D.	N.D.	N.D.	N.D.	N.D.	N.D.	N.D.	N.D.	N.D.	N.D.	N.D.	N.D.	N.D.	N.D.	N.D.	N.D.	N.D.	N.D.	N.D.	N.D.	N.D.	N.D.	N.D.	N.D.	N.D.	N.D.	N.D.
5,2′-O-dimethyluridine	m5Um	No	t	N.D.	N.D.	N.D.	N.D.	N.D.	N.D.	N.D.	N.D.	N.D.	N.D.	N.D.	N.D.	N.D.	N.D.	N.D.	N.D.	N.D.	N.D.	N.D.	N.D.	N.D.	N.D.	N.D.	N.D.	N.D.	N.D.	N.D.	N.D.	N.D.	N.D.	N.D.	N.D.	N.D.	N.D.	N.D.	N.D.	N.D.	N.D.	N.D.	N.D.	N.D.	N.D.	N.D.	N.D.	N.D.	N.D.
2-methylthio-N6-threonylcarbamoyladenosine	ms2t6A	No	t	N.D.	N.D.	N.D.	N.D.	N.D.	N.D.	N.D.	N.D.	N.D.	N.D.	N.D.	N.D.	N.D.	N.D.	N.D.	N.D.	N.D.	N.D.	N.D.	N.D.	N.D.	N.D.	N.D.	N.D.	N.D.	N.D.	N.D.	N.D.	N.D.	N.D.	N.D.	N.D.	N.D.	N.D.	N.D.	N.D.	N.D.	N.D.	N.D.	N.D.	N.D.	N.D.	N.D.	N.D.	N.D.	N.D.
4-thiouridine	s4U	No	t	N.D.	N.D.	N.D.	N.D.	N.D.	N.D.	N.D.	N.D.	N.D.	N.D.	N.D.	N.D.	N.D.	N.D.	N.D.	N.D.	N.D.	N.D.	N.D.	N.D.	N.D.	N.D.	N.D.	N.D.	N.D.	N.D.	N.D.	N.D.	N.D.	N.D.	N.D.	N.D.	N.D.	N.D.	N.D.	N.D.	N.D.	N.D.	N.D.	N.D.	N.D.	N.D.	N.D.	N.D.	N.D.	N.D.
N6-threonylcarbamoyladenosine	t6A	Yes	t	0.0817872	0.0843418	0.0838674	0.0826632	0.0807327	0.0845407	0.0862466	0.0865955	0.0866242	0.099659	0.0882678	0.0878688	#DIV/0!	#DIV/0!	#DIV/0!	#DIV/0!	#DIV/0!	#DIV/0!	0.0906957	0.0881645	0.0919341	0.0909341	0.089929	0.097766	0.08471	0.0858467	0.0881068	0.0886966	0.0872614	0.0893058	N.D.	N.D.	N.D.	N.D.	N.D.	N.D.	N.D.	N.D.	N.D.	N.D.	N.D.	N.D.	N.D.	N.D.	N.D.	N.D.
2-thiouridine	s2U	Yes	t	N.D.	N.D.	N.D.	N.D.	N.D.	N.D.	N.D.	N.D.	N.D.	N.D.	N.D.	N.D.	N.D.	N.D.	N.D.	N.D.	N.D.	N.D.	N.D.	N.D.	N.D.	N.D.	N.D.	N.D.	N.D.	N.D.	N.D.	N.D.	N.D.	N.D.	N.D.	N.D.	N.D.	N.D.	N.D.	N.D.	N.D.	N.D.	N.D.	N.D.	N.D.	N.D.	N.D.	N.D.	N.D.	N.D.
5-methyl-2-thiouridine	m5s2U	No	t	N.D.	N.D.	N.D.	N.D.	N.D.	N.D.	N.D.	N.D.	N.D.	N.D.	N.D.	N.D.	N.D.	N.D.	N.D.	N.D.	N.D.	N.D.	N.D.	N.D.	N.D.	N.D.	N.D.	N.D.	N.D.	N.D.	N.D.	N.D.	N.D.	N.D.	N.D.	N.D.	N.D.	N.D.	N.D.	N.D.	N.D.	N.D.	N.D.	N.D.	N.D.	N.D.	N.D.	N.D.	N.D.	N.D.
3-methyluridine	m3U	Yes	r	0.0717373	0.0820465	0.0751867	0.0822289	0.0809428	0.0807564	0.0759919	0.0792236	0.0825543	0.0812147	0.0825829	0.0795047	0.0821995	0.0889356	0.0709965	0.0810538	0.0819406	0.0728652	0.0759692	0.0788878	0.0794839	0.0763521	0.0790759	0.0771203	0.0816038	0.078773	0.0780518	0.0824011	0.0801291	0.0788744	N.D.	N.D.	N.D.	N.D.	N.D.	N.D.	N.D.	N.D.	N.D.	N.D.	N.D.	N.D.
[truncated: 14 more columns]

## Sheet: Table S6
Table S6: Average Modification Percentage of UHLPC-MS/MS analysis WT and KO cell types. Measurements were averaged between the two biological replicates and three technical replicates of each biological replicate. Each measurement represents modification percentage (modification/canonical base %).
Nucleoside	Abbreviation	Found in S. cerevisiae	PTM Class	WT total RNA	Δtrm1 total RNA	Δtrm2 total RNA	Δtrm10 total RNA	Δtrm11 total RNA	WT mRNA	Δtrm1 mRNA	Δtrm2 mRNA	Δtrm10 mRNA	Δtrm11 mRNA
Dihydrouridine	D	Yes	r, t	1.88617	2.00469	1.99119	2.05319	2.04294	N.D.	N.D.	N.D.	N.D.	N.D.
5-hydroxymethylcytidine	hm5C	No	m, r	N.D.	N.D.	N.D.	N.D.	N.D.	N.D.	N.D.	N.D.	N.D.	N.D.
Pseudouridine	Ψ	Yes	m, r, sn, sno, t	4.79817	5.00988	4.65682	4.95165	5.05488	0.0237231	0.0194446	0.0247526	0.0219113	0.0204139
3-methylcytidine	m3C	Yes	m, t	0.0424824	0.0425674	0.0655441	0.0491134	0.044836	N.D.	N.D.	0.000450988	N.D.	N.D.
1-methyladenosine	m1A	Yes	m, r, t	0.222358	0.233253	0.351103	0.234941	0.224486	0.000135455	0.000171555	0.00013927	0.000157979	0.000139486
5-hydroxyuridine	ho5U	No	t	N.D.	N.D.	N.D.	N.D.	N.D.	N.D.	N.D.	N.D.	N.D.	N.D.
5-methylcytidine	m5C	Yes	m, r, t	0.797484	0.811296	0.682967	0.855777	0.82306	0.0051269	0.00475012	0.00449423	0.00388942	0.00362413
1-methylpseudouridine	m1Ψ	Yes	r, t	0.00357684	0.00402319	0.00430904	0.00371891	0.00433346	N.D.	N.D.	N.D.	N.D.	N.D.
7-methylguanosine	m7G	Yes	m, r, t	0.141939	0.154678	0.175022	0.152052	0.145583	0.0201554	0.0245949	0.0163283	0.0200434	0.0200065
2′-O-methylcytidine	Cm	Yes	m, r, sn, t	1.37481	1.39695	1.22414	1.38975	1.37896	0.00335076	0.00287794	0.00245616	0.00292403	0.00235338
Inosine	I	Yes	m, t	0.131141	0.110263	0.115719	0.108825	0.109334	N.D.	N.D.	0.0081303	N.D.	N.D.
5-methyluridine	m5U	Yes	m, r, t	0.464168	0.493419	0.0326795	0.523102	0.506137	0.000942451	0.000821826	0.000366956	0.000781901	0.00080307
5-formylcytidine	f5C	Yes	m, t	N.D.	N.D.	N.D.	N.D.	N.D.	N.D.	N.D.	N.D.	N.D.	N.D.
2′-O-methyluridine	Um	Yes	m, r, sn, sno, t	0.639343	0.652752	0.597838	0.647088	0.653503	0.00187049	0.00103638	0.00188174	0.00138293	0.0014025
2-methyladenosine	m2A	No	r, t	N.D.	N.D.	N.D.	N.D.	N.D.	N.D.	N.D.	N.D.	N.D.	N.D.
1-methylguanosine	m1G	Yes	m, r, t	0.380744	0.43597	0.396628	0.151372	0.407852	0.00063379	0.000614114	0.000728483	0.000360042	0.000460185
2′-O-methylguanosine	Gm	Yes	m, r, sn, t	1.15401	1.16267	1.0004	1.18684	1.15349	0.004899	0.00437985	0.00526379	0.00392379	0.00387903
1-methylinosine	m1I	Yes	t	0.0287666	0.0296562	0.0260204	0.0309047	0.0289847	N.D.	N.D.	N.D.	N.D.	N.D.
N2-methylguanosine	m2G	Yes	r, sn, t	0.344265	0.348004	0.373242	0.362849	0.00464219	0.000833521	0.000718197	0.00125783	0.000672568	0.000387178
N4-acetylcytidine	ac4C	Yes	m ,r, t	0.222729	0.23242	0.269488	0.231514	0.23009	N.D.	N.D.	N.D.	N.D.	N.D.
2′-O-methyladenosine	Am	Yes	m, r, sn, sno, t	1.22689	1.2222	1.23146	1.21806	1.21079	0.00151563	0.00114517	0.00154675	0.00139292	0.00113152
N6-methyladenosine	m6A	Yes	m, r, sn, t	0.123005	0.121202	0.105371	0.123656	0.120896	0.000320663	0.000273258	0.000339818	0.000252738	0.000212933
N2,N2-dimethylguanosine	m22G	Yes	r, t	0.303458	0.000474115	0.34377	0.323716	0.315705	0.000527431	0.000147851	0.000669436	0.000466072	0.000513086
N6,2′-O-dimethyladenosine	m6Am	No	m, sn	N.D.	N.D.	N.D.	N.D.	N.D.	N.D.	N.D.	N.D.	N.D.	N.D.
N6-isopentenyladenosine	i6A	Yes	t	0.0787155	0.0821772	0.0677884	0.0851665	0.0835566	N.D.	N.D.	N.D.	N.D.	N.D.
N2,N7-dimethylguanosine	m2,7G	Yes	sn, sno	N.D.	N.D.	N.D.	N.D.	N.D.	N.D.	N.D.	N.D.	N.D.	N.D.
6-methyluridine	m6U	No	NF	N.D.	N.D.	N.D.	N.D.	N.D.	N.D.	N.D.	N.D.	N.D.	N.D.
5,2'-O-dimethylcytidine	m5Cm	No	NF	N.D.	N.D.	N.D.	N.D.	N.D.	N.D.	N.D.	N.D.	N.D.	N.D.
5-carboxymethyluridine	cm5U	Yes	t	0.00179788	0.00202789	0.0018213	0.00219958	0.00200831	N.D.	N.D.	N.D.	N.D.	N.D.
2-thiocytidine	s2C	No	t	N.D.	N.D.	N.D.	N.D.	N.D.	N.D.	N.D.	N.D.	N.D.	N.D.
2′-O-methylinosine	Im	No	r	N.D.	N.D.	N.D.	N.D.	N.D.	N.D.	N.D.	N.D.	N.D.	N.D.
5-methoxycarbonylmethyluridine	mcm5U	Yes	t	0.0214379	0.0238468	0.0267235	0.0267378	0.0245574	N.D.	N.D.	N.D.	N.D.	N.D.
5-carboxymethylaminomethyluridine	cmnm5U	Yes	t	0.00027672	0.000320968	0.000604685	0.000172277	0.000253611	N.D.	N.D.	N.D.	N.D.	N.D.
5-methoxyuridine	mo5U	No	t	N.D.	N.D.	N.D.	N.D.	N.D.	N.D.	N.D.	N.D.	N.D.	N.D.
3-(3-amino-3-carboxypropyl)uridine	acp3U	No	r, t	N.D.	N.D.	N.D.	N.D.	N.D.	N.D.	N.D.	N.D.	N.D.	N.D.
uridine 5-oxyacetic acid	cmo5U	No	t	N.D.	N.D.	N.D.	N.D.	N.D.	N.D.	N.D.	N.D.	N.D.	N.D.
2,8-dimethyladenosine	m2,8A	No	r	N.D.	N.D.	N.D.	N.D.	N.D.	N.D.	N.D.	N.D.	N.D.	N.D.
5-methoxycarbonylmethyl-2-thiouridine	mcm5s2U	Yes	t	0.028899	0.0283964	0.0437215	0.0257016	0.028876	N.D.	N.D.	N.D.	N.D.	N.D.
N2,N2,N7-trimethylguanosine	m3G	Yes	sn, sno	N.D.	N.D.	N.D.	N.D.	N.D.	N.D.	N.D.	N.D.	N.D.	N.D.
5,2′-O-dimethyluridine	m5Um	No	t	N.D.	N.D.	N.D.	N.D.	N.D.	N.D.	N.D.	N.D.	N.D.	N.D.
2-methylthio-N6-threonylcarbamoyladenosine	ms2t6A	No	t	N.D.	N.D.	N.D.	N.D.	N.D.	N.D.	N.D.	N.D.	N.D.	N.D.
4-thiouridine	s4U	No	t	N.D.	N.D.	N.D.	N.D.	N.D.	N.D.	N.D.	N.D.	N.D.	N.D.
N6-threonylcarbamoyladenosine	t6A	Yes	t	0.0829888	0.0892103	#DIV/0!	0.0915706	0.0873212	N.D.	N.D.	N.D.	N.D.	N.D.
2-thiouridine	s2U	Yes	t	N.D.	N.D.	N.D.	N.D.	N.D.	N.D.	N.D.	N.D.	N.D.	N.D.
5-methyl-2-thiouridine	m5s2U	No	t	N.D.	N.D.	N.D.	N.D.	N.D.	N.D.	N.D.	N.D.	N.D.	N.D.
3-methyluridine	m3U	Yes	r	0.00432787	0.00250571	0.0796652	0.00152025	0.00172727	N.D.	N.D.	N.D.	N.D.	N.D.

## Sheet: Table S7
Table S7: Percent retention of modification in purified mRNA. Values were calculated by comparing the mod/main% of the mRNA and the total RNA ((mRNA mod/main%)/total RNA mod/main% *100)
Nucleoside	Abbreviation	% Retention in WT mRNA
Pseudouridine	Ψ	0.494421
1-methyladenosine	m1A	0.0609176
5-methylcytidine	m5C	0.642885
7-methylguanosine	m7G	14.2
2′-O-methylcytidine	Cm	0.243725
5-methyluridine	m5U	0.203041
2′-O-methyluridine	Um	0.292564
1-methylguanosine	m1G	0.166461
2′-O-methylguanosine	Gm	0.424519
N2-methylguanosine	m2G	0.242116
2′-O-methyladenosine	Am	0.123534
N6-methyladenosine	m6A	0.260691
N2,N2-dimethylguanosine	m22G	0.173807

## Sheet: Table S8
Table S8: qRT-PCR primer sequences
Gene ID	Gene Name	Forward sequence (5’-3’)	Reverse sequence (5’-3’)
YFL039C	ACT1	GCCTTCTACGTTTCCATCCA	GGCCAAATCGATTCTCAAAA
RDN18-2	18S rRNA	GAGTCCTTGTGGCTCTTGGC	AATACTGATGCCCCCGACC
RDN25-1	25S rRNA	ATGTGATTTCTGCCCAGTGC	AATCCATTCATGCGCGTCAC

## Sheet: Table S9
Table S9: UPLC gradients for analytical separation and wash methods. %B corresponds to the percentage of B mobile phase (acetonitrile + 0.01% formic acid)
Analytical Separation				Wash Method
Time (min)	B (%)			Time (min)	B (%)
0	0			0	0
0.3	0.1			1	60
0.6	0.4			2	0
0.9	0.9			2.5	0
1.3	1.6			3.5	60
4.2	2.5			4.5	0
7.7	4			5	0
12.2	15			6	60
13.2	50			7	0
15.2	100			7.5	0
17	100			8.5	60
17.5	0			9.5	0
27	0			10	0
				11	60
				12	0
				12.5	0
				13.5	60
				14.5	0
				15	0
				16	100
				17.8	100
				18.3	0
				27.8	0

## Sheet: Table S10
Table S10: Multiple reaction monitoring parameters of nucleosides
Nucleoside	Precursor Ion (m/z)	MS1 Resolution	Product Ion (m/z)	MS2 Resolution	Fragmentor (V)	Collision Energy (V)	Cell Accelerator Voltage (V)	Retention Time (min)	Delta Retention Time (min)	Polarity
15N4-I	273.2	Wide	141	Unit	90	5	2	6.64	2.5	Positive
A	268.2	Wide	136	Unit	80	15	2	7.66	2.5	Positive
ac4C	286.2	Wide	154	Unit	70	5	2	9.98	2.5	Positive
acp3U	346.1	Wide	214.1	Unit	60	13	4	2.75	2.5	Positive
Am	282.2	Wide	136	Unit	80	15	2	10.07	2.5	Positive
C	244.2	Wide	112	Unit	70	12	3	1.62	2.5	Positive
Cm	258.1	Wide	112	Unit	70	10	3	4.45	2.5	Positive
cm5U	303	Wide	171.1	Unit	80	5	1	5.56	2.5	Positive
cmnm5U	332.1	Wide	125	Unit	70	13	3	1.97	2.5	Positive
cmo5U	319	Wide	187.1	Unit	60	7	1	5.75	2.5	Positive
D	247.2	Wide	115.1	Unit	70	5	3	1.76	2.5	Positive
f5C	272.2	Wide	140	Unit	70	10	2	7.31	2.5	Positive
G	284.1	Wide	152	Unit	70	10	2	6.86	2.5	Positive
Gm	298.1	Wide	152	Unit	80	5	2	9.18	2.5	Positive
hm5C	274.2	Wide	142	Unit	60	5	2	1.83	2.5	Positive
ho5U	261.2	Wide	129	Unit	80	5	3	2.44	2.5	Positive
I	269.2	Wide	137	Unit	80	10	2	6.64	2.5	Positive
i6A	336	Wide	204.1	Unit	90	17	4	15.14	2.5	Positive
Im	283.1	Wide	136.9	Unit	90	1	2	9.14	2.5	Positive
m1A	282.2	Wide	150	Unit	100	15	2	2.41	2.5	Positive
m1G	298.2	Wide	166.1	Unit	80	5	2	9.15	2.5	Positive
m1I	283	Wide	151	Unit	100	5	2	9.19	2.5	Positive
m1Ψ	259.1	Wide	139	Unit	80	15	2	3.69	2.5	Positive
m3G	326.1	Wide	194	Unit	60	15	1	9.89	2.5	Positive
m22G	312.3	Wide	180.1	Unit	80	10	2	11.44	2.5	Positive
m2,7G	312.1	Wide	180.1	Unit	60	10	1	7.82	2.5	Positive
m2,8A	296.1	Wide	164.1	Unit	80	15	1	11.25	2.5	Positive
m2A	282.1	Wide	150	Unit	100	20	2	8.6	2.5	Positive
m2G	298.1	Wide	166.1	Unit	70	10	2	9.77	2.5	Positive
m3C	258.1	Wide	126.1	Unit	60	5	3	2.09	2.5	Positive
m3U	259	Wide	127	Unit	70	5	3	8.47	2.5	Positive
m5C	258.2	Wide	126	Unit	60	5	3	2.61	2.5	Positive
m5Cm	272.1	Wide	126.1	Unit	80	8	3	7.19	2.5	Positive
m5s2U	275	Wide	143	Unit	70	5	2	10.85	2.5	Positive
m5U	259.1	Wide	127	Unit	70	5	3	7.1	2.5	Positive
m5Um	273.1	Wide	127	Unit	60	5	3	11.06	2.5	Positive
m6A	282.2	Wide	150	Unit	80	15	2	11.3	2.5	Positive
m6Am	296.1	Wide	150	Unit	90	15	2	12.5	2.5	Positive
m6U	259	Wide	127.1	Unit	50	5	2	5.74	2.5	Positive
m7G	298.2	Wide	166	Unit	80	5	2	3.8	2.5	Positive
mcm5s2U	333	Wide	201.1	Unit	60	6	4	12.26	2.5	Positive
mcm5U	317.1	Wide	185.1	Unit	80	6	1	9.64	2.5	Positive
mo5U	275	Wide	143.1	Unit	90	1	6	7.38	2.5	Positive
ms2t6A	459.2	Wide	327.1	Unit	80	12	2	14.56	2.5	Positive
Ψ	245.1	Wide	209	Unit	70	5	4	1.81	2.5	Positive
s2C	260	Wide	128	Unit	90	6	3	3.67	2.5	Positive
s2U	261	Wide	129	Unit	40	3	3	7.61	2.5	Positive
s4U	261.1	Wide	129	Unit	60	11	3	8.21	2.5	Positive
t6A	413.1	Wide	281.1	Unit	70	5	5	13.24	2.5	Positive
U	245.2	Wide	113	Unit	50	5	3	3.36	2.5	Positive
Um	259.2	Wide	113	Unit	70	5	3	8.13	2.5	Positive

[truncated: 4 more sheets: Table S11, Table S12, Table S13, Table S14]
